# Supplementary material
Source: PubMed Central journal article supplement (PMC8864485)
Supplement: MD-013-D1MD00351H-s001.pdf [file MD-013-D1MD00351H-s001.pdf]

## Antibacterial activities of plant-derived xanthenes

Xiaojia Liu<sup>a</sup>, Jianzhong Shen<sup>a,b</sup>, Kui Zhu<sup>a,b,\*</sup>

<sup>a</sup>*National Center for Veterinary Drug Safety Evaluation, College of Veterinary Medicine, China Agricultural University, Beijing00193, China*

<sup>b</sup>*Beijing Key Laboratory of Detection Technology for Animal-Derived Food Safety and Beijing Laboratory for Food Quality and Safety, China Agricultural University, Beijing 100193, China*

|                |                     |
|----------------|---------------------|
| Xiaojia Liu    | 18341440125@163.com |
| Jianzhong Shen | sjz@cau.edu.cn      |
| Kui Zhu        | zhuk@cau.edu.cn     |

\*Corresponding author: K. Zhu, *E-mail*: zhuk@cau.edu.cn

## 1. The detail information of all xanthenes.

**Table S1.** The names, sources, structures, MIC values and bacteria species of the all xanthenes.

| No.               | Names                              | Sources                                                          | Structures                                                                            | Strains                       | MICs     | Ref. |
|-------------------|------------------------------------|------------------------------------------------------------------|---------------------------------------------------------------------------------------|-------------------------------|----------|------|
| Oxygen containing |                                    |                                                                  |                                                                                       |                               |          |      |
| 1                 | 1-Hydroxy-3,6,8-trimethoxyxanthone | <i>Halenia elliptica</i>                                         | 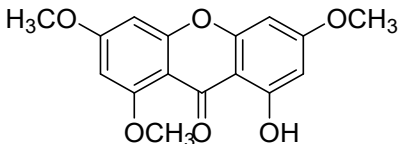   | <i>Staphylococcus aureus</i>  | >100     | 1    |
|                   |                                    |                                                                  |                                                                                       | <i>Bacillus subtilis</i>      | >100     |      |
|                   |                                    |                                                                  |                                                                                       | <i>Escherichia coli</i>       | 256\>512 |      |
|                   |                                    |                                                                  |                                                                                       | <i>Enterobacter aerogenes</i> | 256\>512 |      |
|                   |                                    |                                                                  |                                                                                       | <i>Klebsiella pneumoniae</i>  | >512     |      |
|                   |                                    |                                                                  |                                                                                       | <i>Providencia stuartii</i>   | 256\>512 |      |
|                   |                                    |                                                                  |                                                                                       | <i>Pseudomonas aeruginosa</i> | >512     |      |
| 2                 | Norathyriol                        | <i>Cratoxylum cochinchinense</i> ,<br><i>Garcinia mangostana</i> |  | MRSA                          | 18.75    | 8    |
|                   |                                    |                                                                  |                                                                                       | <i>Bacillus subtilis</i>      | 37.5     |      |
|                   |                                    |                                                                  |                                                                                       | <i>Enterococcus faecalis</i>  | 300      |      |
|                   |                                    |                                                                  |                                                                                       | VRE                           | >300     |      |
|                   |                                    |                                                                  |                                                                                       | <i>Salmonella typhi</i>       | >300     |      |
|                   |                                    |                                                                  |                                                                                       | <i>Shigella sonnei</i>        | >300     |      |
|                   |                                    |                                                                  |                                                                                       | <i>Pseudomonas aeruginosa</i> | 37.5     |      |

|                                   |                                 |                            |                                                                                       |                                                                                                                                                                                                                                                                                                                                                                                                                                                                                                                                                                                                                                                                                                                                                    |                          |      |                              |      |                              |     |                                   |    |                           |     |                         |      |                          |     |                              |      |                                   |    |                         |    |                                   |    |                               |    |    |
|-----------------------------------|---------------------------------|----------------------------|---------------------------------------------------------------------------------------|----------------------------------------------------------------------------------------------------------------------------------------------------------------------------------------------------------------------------------------------------------------------------------------------------------------------------------------------------------------------------------------------------------------------------------------------------------------------------------------------------------------------------------------------------------------------------------------------------------------------------------------------------------------------------------------------------------------------------------------------------|--------------------------|------|------------------------------|------|------------------------------|-----|-----------------------------------|----|---------------------------|-----|-------------------------|------|--------------------------|-----|------------------------------|------|-----------------------------------|----|-------------------------|----|-----------------------------------|----|-------------------------------|----|----|
| 3                                 | Euxanthone                      | <i>Garcinia dulcis</i>     | 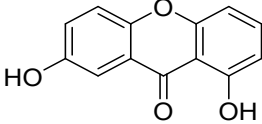   | <table border="1"> <tbody> <tr><td>MRSA</td><td>&gt;128</td></tr> <tr><td><i>Staphylococcus aureus</i></td><td>≥128</td></tr> <tr><td><i>Escherichia coli</i></td><td>128</td></tr> <tr><td><i>Staphylococcus typhimurium</i></td><td>\</td></tr> <tr><td><i>Micrococcus luteus</i></td><td>32</td></tr> <tr><td><i>Bacillus cereus</i></td><td>64</td></tr> <tr><td><i>Bacillus subtilis</i></td><td>128</td></tr> <tr><td><i>Staphylococcus aureus</i></td><td>&gt;128</td></tr> <tr><td><i>Staphylococcus epidermidis</i></td><td>32</td></tr> <tr><td><i>Escherichia coli</i></td><td>16</td></tr> <tr><td><i>Staphylococcus typhimurium</i></td><td>32</td></tr> <tr><td><i>Pseudomonas aeruginosa</i></td><td>16</td></tr> </tbody> </table> | MRSA                     | >128 | <i>Staphylococcus aureus</i> | ≥128 | <i>Escherichia coli</i>      | 128 | <i>Staphylococcus typhimurium</i> | \  | <i>Micrococcus luteus</i> | 32  | <i>Bacillus cereus</i>  | 64   | <i>Bacillus subtilis</i> | 128 | <i>Staphylococcus aureus</i> | >128 | <i>Staphylococcus epidermidis</i> | 32 | <i>Escherichia coli</i> | 16 | <i>Staphylococcus typhimurium</i> | 32 | <i>Pseudomonas aeruginosa</i> | 16 | 18 |
| MRSA                              | >128                            |                            |                                                                                       |                                                                                                                                                                                                                                                                                                                                                                                                                                                                                                                                                                                                                                                                                                                                                    |                          |      |                              |      |                              |     |                                   |    |                           |     |                         |      |                          |     |                              |      |                                   |    |                         |    |                                   |    |                               |    |    |
| <i>Staphylococcus aureus</i>      | ≥128                            |                            |                                                                                       |                                                                                                                                                                                                                                                                                                                                                                                                                                                                                                                                                                                                                                                                                                                                                    |                          |      |                              |      |                              |     |                                   |    |                           |     |                         |      |                          |     |                              |      |                                   |    |                         |    |                                   |    |                               |    |    |
| <i>Escherichia coli</i>           | 128                             |                            |                                                                                       |                                                                                                                                                                                                                                                                                                                                                                                                                                                                                                                                                                                                                                                                                                                                                    |                          |      |                              |      |                              |     |                                   |    |                           |     |                         |      |                          |     |                              |      |                                   |    |                         |    |                                   |    |                               |    |    |
| <i>Staphylococcus typhimurium</i> | \                               |                            |                                                                                       |                                                                                                                                                                                                                                                                                                                                                                                                                                                                                                                                                                                                                                                                                                                                                    |                          |      |                              |      |                              |     |                                   |    |                           |     |                         |      |                          |     |                              |      |                                   |    |                         |    |                                   |    |                               |    |    |
| <i>Micrococcus luteus</i>         | 32                              |                            |                                                                                       |                                                                                                                                                                                                                                                                                                                                                                                                                                                                                                                                                                                                                                                                                                                                                    |                          |      |                              |      |                              |     |                                   |    |                           |     |                         |      |                          |     |                              |      |                                   |    |                         |    |                                   |    |                               |    |    |
| <i>Bacillus cereus</i>            | 64                              |                            |                                                                                       |                                                                                                                                                                                                                                                                                                                                                                                                                                                                                                                                                                                                                                                                                                                                                    |                          |      |                              |      |                              |     |                                   |    |                           |     |                         |      |                          |     |                              |      |                                   |    |                         |    |                                   |    |                               |    |    |
| <i>Bacillus subtilis</i>          | 128                             |                            |                                                                                       |                                                                                                                                                                                                                                                                                                                                                                                                                                                                                                                                                                                                                                                                                                                                                    |                          |      |                              |      |                              |     |                                   |    |                           |     |                         |      |                          |     |                              |      |                                   |    |                         |    |                                   |    |                               |    |    |
| <i>Staphylococcus aureus</i>      | >128                            |                            |                                                                                       |                                                                                                                                                                                                                                                                                                                                                                                                                                                                                                                                                                                                                                                                                                                                                    |                          |      |                              |      |                              |     |                                   |    |                           |     |                         |      |                          |     |                              |      |                                   |    |                         |    |                                   |    |                               |    |    |
| <i>Staphylococcus epidermidis</i> | 32                              |                            |                                                                                       |                                                                                                                                                                                                                                                                                                                                                                                                                                                                                                                                                                                                                                                                                                                                                    |                          |      |                              |      |                              |     |                                   |    |                           |     |                         |      |                          |     |                              |      |                                   |    |                         |    |                                   |    |                               |    |    |
| <i>Escherichia coli</i>           | 16                              |                            |                                                                                       |                                                                                                                                                                                                                                                                                                                                                                                                                                                                                                                                                                                                                                                                                                                                                    |                          |      |                              |      |                              |     |                                   |    |                           |     |                         |      |                          |     |                              |      |                                   |    |                         |    |                                   |    |                               |    |    |
| <i>Staphylococcus typhimurium</i> | 32                              |                            |                                                                                       |                                                                                                                                                                                                                                                                                                                                                                                                                                                                                                                                                                                                                                                                                                                                                    |                          |      |                              |      |                              |     |                                   |    |                           |     |                         |      |                          |     |                              |      |                                   |    |                         |    |                                   |    |                               |    |    |
| <i>Pseudomonas aeruginosa</i>     | 16                              |                            |                                                                                       |                                                                                                                                                                                                                                                                                                                                                                                                                                                                                                                                                                                                                                                                                                                                                    |                          |      |                              |      |                              |     |                                   |    |                           |     |                         |      |                          |     |                              |      |                                   |    |                         |    |                                   |    |                               |    |    |
| 4                                 | 1,7-Dihydroxy-8-methoxyxanthone | <i>Cratoxylum formosum</i> |  | <table border="1"> <tbody> <tr><td><i>Bacillus subtilis</i></td><td>37.5</td></tr> <tr><td><i>Staphylococcus aureus</i></td><td>37.5</td></tr> <tr><td><i>Enterococcus faecalis</i></td><td>300</td></tr> <tr><td>MRSA</td><td>75</td></tr> <tr><td>VRE</td><td>300</td></tr> <tr><td><i>Salmonella typhi</i></td><td>&gt;300</td></tr> </tbody> </table>                                                                                                                                                                                                                                                                                                                                                                                          | <i>Bacillus subtilis</i> | 37.5 | <i>Staphylococcus aureus</i> | 37.5 | <i>Enterococcus faecalis</i> | 300 | MRSA                              | 75 | VRE                       | 300 | <i>Salmonella typhi</i> | >300 | 29                       |     |                              |      |                                   |    |                         |    |                                   |    |                               |    |    |
| <i>Bacillus subtilis</i>          | 37.5                            |                            |                                                                                       |                                                                                                                                                                                                                                                                                                                                                                                                                                                                                                                                                                                                                                                                                                                                                    |                          |      |                              |      |                              |     |                                   |    |                           |     |                         |      |                          |     |                              |      |                                   |    |                         |    |                                   |    |                               |    |    |
| <i>Staphylococcus aureus</i>      | 37.5                            |                            |                                                                                       |                                                                                                                                                                                                                                                                                                                                                                                                                                                                                                                                                                                                                                                                                                                                                    |                          |      |                              |      |                              |     |                                   |    |                           |     |                         |      |                          |     |                              |      |                                   |    |                         |    |                                   |    |                               |    |    |
| <i>Enterococcus faecalis</i>      | 300                             |                            |                                                                                       |                                                                                                                                                                                                                                                                                                                                                                                                                                                                                                                                                                                                                                                                                                                                                    |                          |      |                              |      |                              |     |                                   |    |                           |     |                         |      |                          |     |                              |      |                                   |    |                         |    |                                   |    |                               |    |    |
| MRSA                              | 75                              |                            |                                                                                       |                                                                                                                                                                                                                                                                                                                                                                                                                                                                                                                                                                                                                                                                                                                                                    |                          |      |                              |      |                              |     |                                   |    |                           |     |                         |      |                          |     |                              |      |                                   |    |                         |    |                                   |    |                               |    |    |
| VRE                               | 300                             |                            |                                                                                       |                                                                                                                                                                                                                                                                                                                                                                                                                                                                                                                                                                                                                                                                                                                                                    |                          |      |                              |      |                              |     |                                   |    |                           |     |                         |      |                          |     |                              |      |                                   |    |                         |    |                                   |    |                               |    |    |
| <i>Salmonella typhi</i>           | >300                            |                            |                                                                                       |                                                                                                                                                                                                                                                                                                                                                                                                                                                                                                                                                                                                                                                                                                                                                    |                          |      |                              |      |                              |     |                                   |    |                           |     |                         |      |                          |     |                              |      |                                   |    |                         |    |                                   |    |                               |    |    |

|   |                                  |                              |                                                                                      |                               |             |    |
|---|----------------------------------|------------------------------|--------------------------------------------------------------------------------------|-------------------------------|-------------|----|
|   |                                  |                              |                                                                                      | <i>Shigella sonnei</i>        | >300        |    |
|   |                                  |                              |                                                                                      | <i>Pseudomonas aeruginosa</i> | 300         |    |
| 5 | 3,4-Dihydroxy-2-methoxy-xanthone | <i>Kielmeyera variabilis</i> | 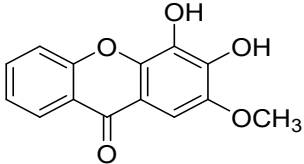  | MRSA                          | 16-32\64    | 40 |
| 6 | 5-Hydroxy-1,3-dimethoxy-xanthone | <i>Kielmeyera variabilis</i> |   | MRSA                          | 64-128\>512 | 40 |
| 7 | 4-hydroxy-2,3-dimethoxy-xanthone | <i>Kielmeyera variabilis</i> |  | MRSA                          | 64-128\>512 | 40 |

|    |                               |                                        |                                                                                      |                                   |            |    |
|----|-------------------------------|----------------------------------------|--------------------------------------------------------------------------------------|-----------------------------------|------------|----|
| 8  | 3-hydroxy-2-methoxy-xanthone  | <i>Kielmeyera variabilis</i>           | 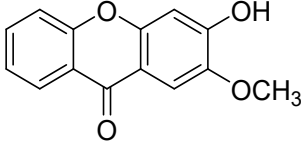  | MRSA                              | 64\32      | 40 |
| 9  | 2-hydroxy-1-methoxy-xanthone  | <i>Kielmeyera variabilis</i>           |   | MRSA                              | 64\32\128  | 40 |
| 10 | 1,5-Dihydroxy-xanthone        | the roots of <i>Garcinia propinqua</i> |   | <i>Bacillus cereus</i>            | 8          | 43 |
|    |                               |                                        |                                                                                      | <i>Bacillus subtilis</i>          | 32         |    |
|    |                               |                                        |                                                                                      | <i>Escherichia coli</i>           | 128        |    |
|    |                               |                                        |                                                                                      | <i>Staphylococcus typhimurium</i> | 128        |    |
| 11 | 1,3,5,6-Tetrahydroxy-xanthone | <i>Garcinia fusca</i>                  |  | <i>Helicobacter pylori</i>        | 2.02\16.25 | 46 |
|    |                               |                                        |                                                                                      | <i>Micrococcus luteus</i>         | 128        |    |
|    |                               |                                        |                                                                                      | <i>Bacillus cereus</i>            | 64         |    |
|    |                               |                                        |                                                                                      | <i>Bacillus subtilis</i>          | 64         |    |
|    |                               |                                        |                                                                                      | <i>Staphylococcus aureus</i>      | 128        |    |
|    |                               |                                        |                                                                                      | <i>Staphylococcus epidermidis</i> | 128        |    |
|    |                               |                                        |                                                                                      | <i>Escherichia coli</i>           | 64         |    |
|    |                               |                                        |                                                                                      | <i>Salmonella</i>                 | 32         |    |

|    |                                  |                                           |                                                                                      |                                   |      |    |
|----|----------------------------------|-------------------------------------------|--------------------------------------------------------------------------------------|-----------------------------------|------|----|
|    |                                  |                                           |                                                                                      | <i>typhimurium</i>                |      |    |
|    |                                  |                                           |                                                                                      | <i>Pseudomonas aeruginosa</i>     | 128  |    |
| 12 | Cratosumatranone F               | the twigs of <i>Cratoxylum sumatranum</i> | 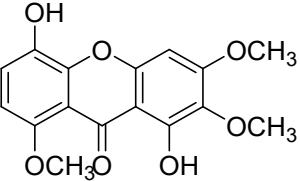  | <i>Micrococcus luteus</i>         | 128  | 51 |
|    |                                  |                                           |                                                                                      | <i>Bacillus cereus</i>            | 64   |    |
|    |                                  |                                           |                                                                                      | <i>Bacillus subtilis</i>          | 128  |    |
|    |                                  |                                           |                                                                                      | <i>Staphylococcus aureus</i>      | >128 |    |
|    |                                  |                                           |                                                                                      | <i>Staphylococcus epidermidis</i> | 128  |    |
|    |                                  |                                           |                                                                                      | <i>Escherichia coli</i>           | 64   |    |
|    |                                  |                                           |                                                                                      | <i>Salmonella typhimurium</i>     | 32   |    |
|    |                                  |                                           |                                                                                      | <i>Pseudomonas aeruginosa</i>     | 128  |    |
| 13 | 1,5-Dihydroxy-8-methoxy-xanthone | the twigs of <i>Cratoxylum sumatranum</i> |  | <i>Micrococcus luteus</i>         | 32   | 51 |
|    |                                  |                                           |                                                                                      | <i>Bacillus cereus</i>            | 64   |    |
|    |                                  |                                           |                                                                                      | <i>Bacillus subtilis</i>          | 128  |    |
|    |                                  |                                           |                                                                                      | <i>Staphylococcus aureus</i>      | 128  |    |
|    |                                  |                                           |                                                                                      | <i>Staphylococcus epidermidis</i> | 32   |    |
|    |                                  |                                           |                                                                                      | <i>Escherichia coli</i>           | 32   |    |
|    |                                  |                                           |                                                                                      | <i>Salmonella typhimurium</i>     | 32   |    |
|    |                                  |                                           |                                                                                      | <i>Pseudomonas</i>                | 16   |    |

|    |                                      |                                           |                                                                                       |                                                                                                                                                                                                                                                   |                                                    |    |
|----|--------------------------------------|-------------------------------------------|---------------------------------------------------------------------------------------|---------------------------------------------------------------------------------------------------------------------------------------------------------------------------------------------------------------------------------------------------|----------------------------------------------------|----|
|    |                                      |                                           |                                                                                       | <i>aeruginosa</i>                                                                                                                                                                                                                                 |                                                    |    |
| 14 | 1,5-Dihydroxy-6,7-dimethoxy-xanthone | the twigs of <i>Cratoxylum sumatranum</i> | 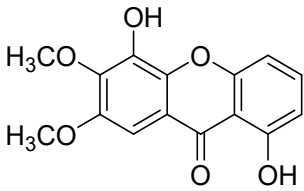   | <i>Micrococcus luteus</i><br><i>Bacillus cereus</i><br><i>Bacillus subtilis</i><br><i>Staphylococcus aureus</i><br><i>Staphylococcus epidermidis</i><br><i>Escherichia coli</i><br><i>Salmonella typhimurium</i><br><i>Pseudomonas aeruginosa</i> | 32<br>16<br>64<br>128<br>16<br>64<br>32<br>16      | 51 |
| 15 | 1,3,6-Trihydroxy-7-methoxy-xanthone  | the twigs of <i>Cratoxylum sumatranum</i> |    | <i>Micrococcus luteus</i><br><i>Bacillus cereus</i><br><i>Bacillus subtilis</i><br><i>Staphylococcus aureus</i><br><i>Staphylococcus epidermidis</i><br><i>Escherichia coli</i><br><i>Salmonella typhimurium</i><br><i>Pseudomonas aeruginosa</i> | 128<br>128<br>128<br>>128<br>128<br>64<br>4<br>128 | 51 |
| 16 | 1,3,5,6-Tetrahydroxy-                | the twigs of <i>Cratoxylum</i>            |  | <i>Micrococcus luteus</i>                                                                                                                                                                                                                         | 128                                                | 51 |

|    |                                 |                                           |                                                                                       |                                   |     |    |
|----|---------------------------------|-------------------------------------------|---------------------------------------------------------------------------------------|-----------------------------------|-----|----|
|    | xanthone                        | <i>sumatranum</i>                         |                                                                                       | <i>Bacillus cereus</i>            | 64  |    |
|    |                                 |                                           |                                                                                       | <i>Bacillus subtilis</i>          | 64  |    |
|    |                                 |                                           |                                                                                       | <i>Staphylococcus aureus</i>      | 128 |    |
|    |                                 |                                           |                                                                                       | <i>Staphylococcus epidermidis</i> | 128 |    |
|    |                                 |                                           |                                                                                       | <i>Escherichia coli</i>           | 64  |    |
|    |                                 |                                           |                                                                                       | <i>Salmonella typhimurium</i>     | 32  |    |
|    |                                 |                                           |                                                                                       | <i>Pseudomonas aeruginosa</i>     | 128 |    |
| 17 | 2,8-Dihydroxy-1-methoxyxanthone | the twigs of <i>Cratoxylum sumatranum</i> | 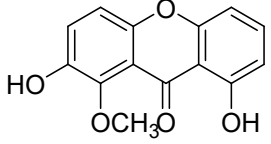   | <i>Micrococcus luteus</i>         | 64  | 51 |
|    |                                 |                                           |                                                                                       | <i>Bacillus cereus</i>            | 64  |    |
|    |                                 |                                           |                                                                                       | <i>Bacillus subtilis</i>          | 128 |    |
|    |                                 |                                           |                                                                                       | <i>Staphylococcus aureus</i>      | 128 |    |
|    |                                 |                                           |                                                                                       | <i>Staphylococcus epidermidis</i> | 64  |    |
|    |                                 |                                           |                                                                                       | <i>Escherichia coli</i>           | 16  |    |
|    |                                 |                                           |                                                                                       | <i>Salmonella typhimurium</i>     | 32  |    |
|    |                                 |                                           |                                                                                       | <i>Pseudomonas aeruginosa</i>     | 64  |    |
| 18 | Cratoxyarborenone F             | the twigs of <i>Cratoxylum sumatranum</i> |  | <i>Micrococcus luteus</i>         | 64  | 51 |
|    |                                 |                                           |                                                                                       | <i>Bacillus cereus</i>            | 64  |    |
|    |                                 |                                           |                                                                                       | <i>Bacillus subtilis</i>          | 128 |    |



|    |                                       |                                                                   |                                                                                      |                                                                                                                                                                                     |    |
|----|---------------------------------------|-------------------------------------------------------------------|--------------------------------------------------------------------------------------|-------------------------------------------------------------------------------------------------------------------------------------------------------------------------------------|----|
|    |                                       |                                                                   |                                                                                      | <i>Staphylococcus aureus</i> 128<br><i>Staphylococcus epidermidis</i> 64<br><i>Escherichia coli</i> 32<br><i>Salmonella typhimurium</i> 64<br><i>Pseudomonas aeruginosa</i> 128     |    |
| 19 | 1,7-Dihydroxyxanthone                 | <i>Harungana madagascariensis</i> ,<br><i>Garcinia succifolia</i> | 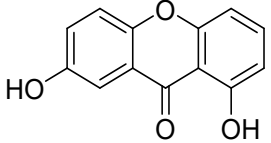  | MRSA >25\6.25\>256<br><i>Staphylococcus aureus</i> >25\6.25\>256<br><i>Bacillus subtilis</i> >256<br><i>Pseudomonas aeruginosa</i> >256<br><i>Escherichia coli</i> >256<br>VRE >256 | 8  |
| 20 | 1, 7-dimethoxy-5,6-trihydroxyxanthone | <i>Hypericum sampsonii</i>                                        |  | MRSA >128                                                                                                                                                                           | 63 |

|    |                                    |                            |                                                                                       |                               |      |    |
|----|------------------------------------|----------------------------|---------------------------------------------------------------------------------------|-------------------------------|------|----|
| 21 | 5-Methoxy-1,3,7-trihydroxyxanthone | <i>Hypericum sampsonii</i> | 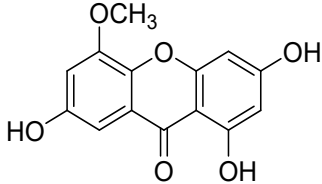   | MRSA                          | >128 | 63 |
| 22 | 2-Methoxy-1,5-dihydroxyxanthone    | <i>Hypericum sampsonii</i> |    | MRSA                          | >128 | 63 |
| 23 | 1,5-Dihydroxyxanthone              | <i>Garcinia succifolia</i> |    | <i>Staphylococcus aureus</i>  | >256 | 66 |
|    |                                    |                            |                                                                                       | <i>Bacillus subtilis</i>      | >256 |    |
|    |                                    |                            |                                                                                       | <i>Pseudomonas aeruginosa</i> | >256 |    |
|    |                                    |                            |                                                                                       | <i>Escherichia coli</i>       | >256 |    |
|    |                                    |                            |                                                                                       | MRSA                          | >256 |    |
|    |                                    |                            |                                                                                       | VRE                           | >256 |    |
| 24 | 1,3,7-Trihydroxyxanthone           | <i>Garcinia succifolia</i> |  | <i>Staphylococcus aureus</i>  | >256 | 66 |
|    |                                    |                            |                                                                                       | <i>Bacillus subtilis</i>      | >256 |    |
|    |                                    |                            |                                                                                       | <i>Pseudomonas aeruginosa</i> | >256 |    |
|    |                                    |                            |                                                                                       | <i>Escherichia coli</i>       | >256 |    |
|    |                                    |                            |                                                                                       | MRSA                          | >256 |    |

|    |                              |                            |                                                                                       |                               |      |    |
|----|------------------------------|----------------------------|---------------------------------------------------------------------------------------|-------------------------------|------|----|
|    |                              |                            |                                                                                       | VRE                           | >256 |    |
| 25 | 1,5,6-Trihydroxyxanthone     | <i>Garcinia succifolia</i> | 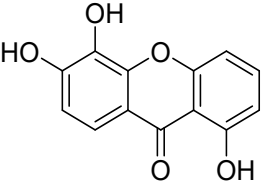   | <i>Staphylococcus aureus</i>  | 64   | 66 |
|    |                              |                            |                                                                                       | <i>Bacillus subtilis</i>      | 64   |    |
|    |                              |                            |                                                                                       | <i>Pseudomonas aeruginosa</i> | >256 |    |
|    |                              |                            |                                                                                       | <i>Escherichia coli</i>       | >256 |    |
|    |                              |                            |                                                                                       | MRSA                          | 64   |    |
|    |                              |                            |                                                                                       | VRE                           | >256 |    |
| 26 | 1,6,7-Trihydroxyxanthone     | <i>Garcinia succifolia</i> |    | <i>Staphylococcus aureus</i>  | 64   | 66 |
|    |                              |                            |                                                                                       | <i>Bacillus subtilis</i>      | 128  |    |
|    |                              |                            |                                                                                       | <i>Pseudomonas aeruginosa</i> | >256 |    |
|    |                              |                            |                                                                                       | <i>Escherichia coli</i>       | >256 |    |
|    |                              |                            |                                                                                       | MRSA                          | 64   |    |
|    |                              |                            |                                                                                       | VRE                           | >256 |    |
| 27 | 1,3,6,7-Tetrahydroxyxanthone | <i>Garcinia succifolia</i> |  | <i>Staphylococcus aureus</i>  | 256  | 66 |
|    |                              |                            |                                                                                       | <i>Bacillus subtilis</i>      | 256  |    |
|    |                              |                            |                                                                                       | <i>Pseudomonas aeruginosa</i> | >256 |    |
|    |                              |                            |                                                                                       | <i>Escherichia coli</i>       | >256 |    |
|    |                              |                            |                                                                                       | MRSA                          | >256 |    |

|    |                                  |                              |                                                                                       |                           |             |    |
|----|----------------------------------|------------------------------|---------------------------------------------------------------------------------------|---------------------------|-------------|----|
|    |                                  |                              |                                                                                       | VRE                       | >256        |    |
| 28 | 3,4-dihydroxy-2-methoxy-xanthone | <i>Kielmeyera variabilis</i> | 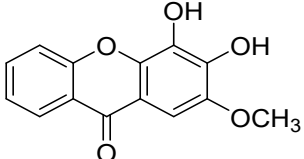   | MRSA                      | 16\32\64    | 40 |
| 29 | 5-hydroxy-1,3-dimethoxy-xanthone | <i>Kielmeyera variabilis</i> |    | MRSA                      | 64\128\>512 | 40 |
| 30 | 4-hydroxy-2,3-dimethoxy-xanthone | <i>Kielmeyera variabilis</i> |    | MRSA                      | 64\128\>512 | 40 |
| 31 | 3-hydroxy-2-methoxy-xanthone     | <i>Kielmeyera variabilis</i> |   | MRSA                      | 64\32       | 40 |
| 32 | 2-hydroxy-1-methoxy-xanthone     | <i>Kielmeyera variabilis</i> |  | MRSA                      | 64\128\32   | 40 |
| 33 | Questin                          | <i>Cassia obtusifolia</i>    |  | <i>Micrococcus luteus</i> | 25          | 18 |
|    |                                  |                              |                                                                                       | <i>Staphylococcus</i>     | 25          |    |

|                  |                                   |                                                                            |                                                                                       |                                                                                                                                                                                                               |                                                  |              |
|------------------|-----------------------------------|----------------------------------------------------------------------------|---------------------------------------------------------------------------------------|---------------------------------------------------------------------------------------------------------------------------------------------------------------------------------------------------------------|--------------------------------------------------|--------------|
|                  |                                   |                                                                            |                                                                                       | <i>aureus</i><br><i>Bacillus megaterium</i><br><i>Bacillus anthracis</i><br><i>Bacillus paratyphosum</i><br>MRSA<br><i>Pseudomonas aeruginosa</i><br><i>Escherichia coli</i><br><i>Enterobacter aerogenes</i> | <br>12.5<br>12.5<br>25<br>>100<br>50<br>50<br>50 |              |
| Monoprenyl group |                                   |                                                                            |                                                                                       |                                                                                                                                                                                                               |                                                  |              |
| 34               | Cowagarcinone B                   | <i>Garcinia cowa</i>                                                       | 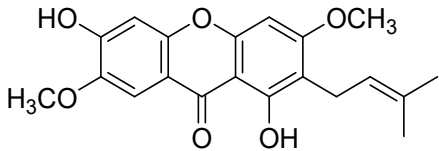   | MRSA<br>Staphylococcus aureus<br>Escherichia coli<br>Salmonella typhimurium                                                                                                                                   | >128<br>>128<br>128<br>128                       | 1            |
| 35               | 1,3,7-trihydroxy-2-prenylxanthone | <i>Cudrania cochinchinensis</i> , the leaves of <i>Garcinia goudotiana</i> |  | <i>Bacillus subtilis</i><br>Staphylococcus aureus<br>Enterococci faecalis<br><i>Mycobacterium smegmatis</i>                                                                                                   | 6.25<br>6.25<br>6.25\39<br>39                    | 15,44,<br>60 |

|    |                                             |                                 |                                                                                       |                                   |              |       |
|----|---------------------------------------------|---------------------------------|---------------------------------------------------------------------------------------|-----------------------------------|--------------|-------|
|    |                                             |                                 |                                                                                       | <i>Staphylococcus lugdunensis</i> | 78           |       |
|    |                                             |                                 |                                                                                       | MRSA                              | 6.25         |       |
|    |                                             |                                 |                                                                                       | <i>Micrococcus lutes</i>          | 6.25         |       |
| 36 | 1,5-dihydroxy-2-isoprenyl-3-methoxyxanthone | <i>Garcinia mangostana</i>      | 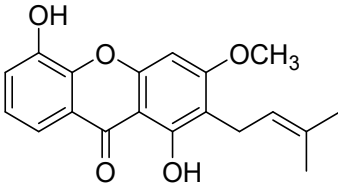   | MRSA                              | 25           | 54    |
|    |                                             |                                 |                                                                                       | <i>Staphylococcus aureus</i>      | 12.5         |       |
|    |                                             |                                 |                                                                                       | <i>Escherichia coli</i>           | 25           |       |
| 37 | 1,7-dihydroxy-2-isoprenyl-3-methoxyxanthone | <i>Garcinia mangostana</i>      |    | MRSA                              | 25           | 54    |
|    |                                             |                                 |                                                                                       | <i>Staphylococcus aureus</i>      | 12.5         |       |
|    |                                             |                                 |                                                                                       | <i>Escherichia coli</i>           | 25           |       |
| 38 | Cudraxanthone S                             | <i>Cudrania cochinchinensis</i> |   | <i>Bacillus subtilis</i>          | 3.13         | 44,60 |
|    |                                             |                                 |                                                                                       | <i>Staphylococcus aureus</i>      | 3.13         |       |
|    |                                             |                                 |                                                                                       | <i>Micrococcus lutes</i>          | 12.5         |       |
|    |                                             |                                 |                                                                                       | <i>Enterococci faecalis</i>       | 12.5\6.25\25 |       |
|    |                                             |                                 |                                                                                       | MRSA                              | 3.13-6.25    |       |
| 39 | Subelliptenone F                            | <i>Garcinia subelliptica</i>    |  | MRSA                              | 25           | 54    |
|    |                                             |                                 |                                                                                       | <i>Staphylococcus aureus</i>      | 25\12.5      |       |
|    |                                             |                                 |                                                                                       | <i>Escherichia coli</i>           | 25           |       |

|                               |                                 |                                           |                                                                                      |                                   |                |    |
|-------------------------------|---------------------------------|-------------------------------------------|--------------------------------------------------------------------------------------|-----------------------------------|----------------|----|
| 40                            | 12-b-dihydroxy-des-D-garcigerin | <i>Garcinia subelliptica</i>              | 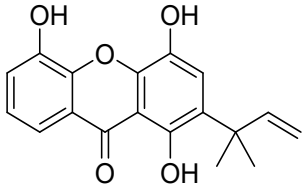  | MRSA                              | 12.5\3.13\6.25 | 54 |
|                               |                                 |                                           |                                                                                      | <i>Staphylococcus aureus</i>      | 25\6.25        |    |
| 41                            | Vieillardixanthone B            | the root of <i>Cratoxylum formosum</i>    |   | <i>Bacillus subtilis</i>          | 300            | 29 |
|                               |                                 |                                           |                                                                                      | <i>Staphylococcus aureus</i>      | 300            |    |
|                               |                                 |                                           |                                                                                      | <i>Enterococcus faecalis</i>      | 300            |    |
|                               |                                 |                                           |                                                                                      | MRSA                              | 300            |    |
|                               |                                 |                                           |                                                                                      | VRE                               | 300            |    |
|                               |                                 |                                           |                                                                                      | <i>Salmonella typhi</i>           | >300           |    |
|                               |                                 |                                           |                                                                                      | <i>Shigella sonnei</i>            | >300           |    |
| <i>Pseudomonas aeruginosa</i> | >300                            |                                           |                                                                                      |                                   |                |    |
| 42                            | Isocudranixanthone B            | the roots of <i>Cratoxylum sumatranum</i> |  | <i>Micrococcus luteus</i>         | >128           | 51 |
|                               |                                 |                                           |                                                                                      | <i>Bacillus cereus</i>            | >128           |    |
|                               |                                 |                                           |                                                                                      | <i>Bacillus subtilis</i>          | \              |    |
|                               |                                 |                                           |                                                                                      | <i>Staphylococcus aureus</i>      | >128           |    |
|                               |                                 |                                           |                                                                                      | <i>Staphylococcus epidermidis</i> | >128           |    |
|                               |                                 |                                           |                                                                                      | <i>Escherichia coli</i>           | >128           |    |
|                               |                                 |                                           |                                                                                      | <i>Salmonella typhimurium</i>     | >128           |    |

|    |                     |                            |                                                                                       |                                                                                                                                                          |                                              |    |
|----|---------------------|----------------------------|---------------------------------------------------------------------------------------|----------------------------------------------------------------------------------------------------------------------------------------------------------|----------------------------------------------|----|
|    |                     |                            |                                                                                       | <i>Pseudomonas aeruginosa</i>                                                                                                                            | >128                                         |    |
| 43 | Hypericumxanthone A | <i>Hypericum sampsonii</i> | 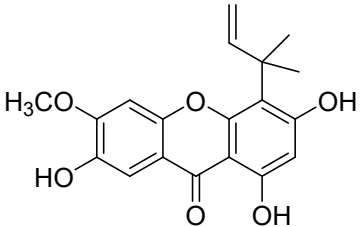   | MRSA                                                                                                                                                     | 32                                           | 63 |
| 44 | Caroxanthone        | <i>Garcinia nobilis</i>    |    | <i>Escherichia coli</i><br><i>Enterobacter aerogenes</i><br><i>Klebsiella pneumoniae</i><br><i>Providencia stuartii</i><br><i>Pseudomonas aeruginosa</i> | 256\128\>512<br>>512<br>>512<br>>512<br>>512 | 21 |
| 45 | Dulxanthone A       | <i>Garcinia mangostana</i> |   | MRSA<br><i>Vibrio vulnificus</i><br><i>Vibrio rotiferianus</i><br><i>Vibrio campbellii</i>                                                               | 3.9<br>15.6<br>15.6<br>31.2                  | 38 |
| 46 | Garcicowanone A     | <i>Garcinia cowa</i>       |  | <i>Bacillus cereus</i><br><i>Bacillus subtilis</i><br><i>Micrococcus luteus</i>                                                                          | 0.25<br>2<br>4                               | 2  |



|    |                      |                                               |                                                                                       |                                                                                                                                                                                              |    |
|----|----------------------|-----------------------------------------------|---------------------------------------------------------------------------------------|----------------------------------------------------------------------------------------------------------------------------------------------------------------------------------------------|----|
|    |                      |                                               |                                                                                       | <i>Staphylococcus aureus</i><br>64<br><i>Escherichia coli</i><br>64<br><i>Pseudomonas aeruginosa</i><br>128<br><i>Salmonella typhimurium</i><br>64<br><i>Staphylococcus epidermidis</i><br>4 |    |
| 47 | Globulixanthone D    | the root bark of <i>Symphonia globulifera</i> | 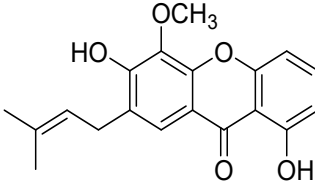   | <i>Staphylococcus aureus</i><br>0.80<br><i>Bacillus subtilis</i><br>12.5<br><i>Vibrio anguillarum</i><br>>100<br><i>Escherichia coli</i><br>>100                                             | 11 |
| 48 | Nigrolineaxanthone T | the bark of <i>Garcinia mangostana</i>        |   | MRSA<br>62.4<br><i>Vibrio vulnificus</i><br>>125<br><i>Vibrio rotiferianus</i><br>>125<br><i>Vibrio campbellii</i><br>>125                                                                   | 38 |
| 49 | Globulixanthone C    | the root bark of <i>Symphonia globulifera</i> |  | <i>Staphylococcus aureus</i><br>14.05<br><i>Bacillus subtilis</i><br>8.24<br><i>Vibrio anguillarum</i><br>\                                                                                  | 11 |

|    |                       |                                            |                                                                                     |                               |       |    |
|----|-----------------------|--------------------------------------------|-------------------------------------------------------------------------------------|-------------------------------|-------|----|
|    |                       |                                            |                                                                                     | <i>Escherichia coli</i>       | >100  |    |
| 50 | Nigrolineaxanthone F  | the stem bark <i>Garcinia nigrolinaeta</i> | 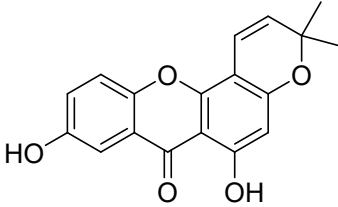 | MRSA                          | 2     | 20 |
| 51 | 6-deoxyiso-jacareubin | <i>Vismia laurentii</i>                    |  | <i>Citrobacter freundii</i>   | 19.53 | 32 |
|    |                       |                                            |                                                                                     | <i>Enterobacter aerogens</i>  | \     |    |
|    |                       |                                            |                                                                                     | <i>Enterobacter cloacae</i>   | \     |    |
|    |                       |                                            |                                                                                     | <i>Escherichia coli</i>       | \     |    |
|    |                       |                                            |                                                                                     | <i>Klebsiella pneumoniae</i>  | 39.06 |    |
|    |                       |                                            |                                                                                     | <i>Morganella morganii</i>    | 78.12 |    |
|    |                       |                                            |                                                                                     | <i>Proteus mirabilis</i>      | 78.12 |    |
|    |                       |                                            |                                                                                     | <i>proteus vulgaris</i>       | 39.06 |    |
|    |                       |                                            |                                                                                     | <i>Pseudomonas aeruginosa</i> | \     |    |
|    |                       |                                            |                                                                                     | <i>Shigella dysenteriae</i>   | \     |    |
|    |                       |                                            |                                                                                     | <i>Shigella flexneri</i>      | \     |    |
|    |                       |                                            |                                                                                     | <i>Salmonella typhi</i>       | \     |    |
|    |                       |                                            |                                                                                     | <i>Streptococcus faecalis</i> | \     |    |
|    |                       |                                            |                                                                                     | <i>Staphylococcus aureus</i>  | 39.06 |    |

|    |                    |                                           |                                                                                       |                                                                                                                                                                                                                                                                                                |    |
|----|--------------------|-------------------------------------------|---------------------------------------------------------------------------------------|------------------------------------------------------------------------------------------------------------------------------------------------------------------------------------------------------------------------------------------------------------------------------------------------|----|
|    |                    |                                           |                                                                                       | <i>Bacillus cereus</i><br>78.12<br><i>Bacillus megaterium</i><br>\<br><i>Bacillus stearothermophilus</i><br>1.22<br><br><i>Bacillus subtilis</i><br>4.88                                                                                                                                       |    |
| 52 | Isojacareubin      | <i>Garcinia fusca</i>                     | 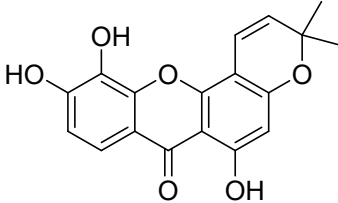   | <i>Helicobacter pylori</i><br>2.54                                                                                                                                                                                                                                                             | 46 |
| 53 | Cratosumatranone D | the roots of <i>Cratoxylum sumatranum</i> |    | <i>Micrococcus luteus</i><br>8<br><i>Bacillus cereus</i><br>8<br><i>Bacillus subtilis</i><br>16<br><i>Staphylococcus aureus</i><br>32<br><i>Staphylococcus epidermidis</i><br>8<br><i>Escherichia coli</i><br>64<br><i>Salmonella typhimurium</i><br>32<br><i>Pseudomonas aeruginosa</i><br>16 | 51 |
| 54 | Cratosumatranone E | the roots of <i>Cratoxylum sumatranum</i> |  | <i>Micrococcus luteus</i><br>>128<br><i>Bacillus cereus</i><br>>128<br><i>Bacillus subtilis</i><br>\                                                                                                                                                                                           | 51 |

|    |                 |                                           |                                                                                       |                                                                                                                                                                                                                                                                          |    |
|----|-----------------|-------------------------------------------|---------------------------------------------------------------------------------------|--------------------------------------------------------------------------------------------------------------------------------------------------------------------------------------------------------------------------------------------------------------------------|----|
|    |                 |                                           |                                                                                       | <i>Staphylococcus aureus</i> >128<br><i>Staphylococcus epidermidis</i> >128<br><i>Escherichia coli</i> >128<br><i>Salmonella typhimurium</i> >128<br><i>Pseudomonas aeruginosa</i> >128                                                                                  |    |
| 55 | Pruniflorone N  | the roots of <i>Cratoxylum sumatranum</i> | 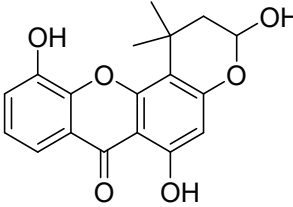   | <i>Micrococcus luteus</i> 16<br><i>Bacillus cereus</i> 32<br><i>Bacillus subtilis</i> 32<br><i>Staphylococcus aureus</i> 8<br><i>Staphylococcus epidermidis</i> 16<br><i>Escherichia coli</i> 32<br><i>Salmonella typhimurium</i> 32<br><i>Pseudomonas aeruginosa</i> 16 | 51 |
| 56 | Pancixanthone B | the roots of <i>Cratoxylum sumatranum</i> |  | <i>Micrococcus luteus</i> 32<br><i>Bacillus cereus</i> 16<br><i>Bacillus subtilis</i> 128<br><i>Staphylococcus aureus</i> >128<br><i>Staphylococcus</i> 32                                                                                                               | 51 |

|    |                                       |                                           |                                                                                       |                                   |      |    |
|----|---------------------------------------|-------------------------------------------|---------------------------------------------------------------------------------------|-----------------------------------|------|----|
|    |                                       |                                           |                                                                                       | <i>epidermidis</i>                |      |    |
|    |                                       |                                           |                                                                                       | <i>Escherichia coli</i>           | 32   |    |
|    |                                       |                                           |                                                                                       | <i>Salmonella typhimurium</i>     | 32   |    |
|    |                                       |                                           |                                                                                       | <i>Pseudomonas aeruginosa</i>     | 16   |    |
| 57 | Pruniflorone M                        | the roots of <i>Cratoxylum sumatranum</i> | 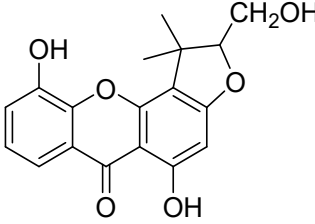   | <i>Micrococcus luteus</i>         | >128 | 51 |
|    |                                       |                                           |                                                                                       | <i>Bacillus cereus</i>            | >128 |    |
|    |                                       |                                           |                                                                                       | <i>Bacillus subtilis</i>          | \    |    |
|    |                                       |                                           |                                                                                       | <i>Staphylococcus aureus</i>      | >128 |    |
|    |                                       |                                           |                                                                                       | <i>Staphylococcus epidermidis</i> | >128 |    |
|    |                                       |                                           |                                                                                       | <i>Escherichia coli</i>           | >128 |    |
|    |                                       |                                           |                                                                                       | <i>Salmonella typhimurium</i>     | >128 |    |
|    |                                       |                                           |                                                                                       | <i>Pseudomonas aeruginosa</i>     | >128 |    |
| 58 | 5-O-methyl-2-deprenylrheedixanthone B | the roots of <i>Cratoxylum sumatranum</i> |  | <i>Micrococcus luteus</i>         | >128 | 51 |
|    |                                       |                                           |                                                                                       | <i>Bacillus cereus</i>            | >128 |    |
|    |                                       |                                           |                                                                                       | <i>Bacillus subtilis</i>          | \    |    |
|    |                                       |                                           |                                                                                       | <i>Staphylococcus aureus</i>      | >128 |    |
|    |                                       |                                           |                                                                                       | <i>Staphylococcus epidermidis</i> | >128 |    |
|    |                                       |                                           |                                                                                       | <i>Escherichia coli</i>           | >128 |    |

|                |                     |                                                                                                                                                                                                 |                                                                                       |                                   |                                |               |
|----------------|---------------------|-------------------------------------------------------------------------------------------------------------------------------------------------------------------------------------------------|---------------------------------------------------------------------------------------|-----------------------------------|--------------------------------|---------------|
|                |                     |                                                                                                                                                                                                 |                                                                                       | <i>Salmonella typhimurium</i>     | >128                           |               |
|                |                     |                                                                                                                                                                                                 |                                                                                       | <i>Pseudomonas aeruginosa</i>     | >128                           |               |
| 59             | Jacareubin          | the twigs of <i>Garcinia staudtii</i>                                                                                                                                                           | 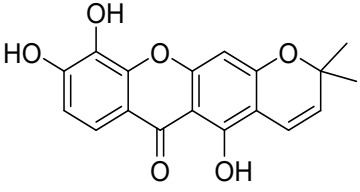   | MRSA                              | \                              | 19            |
| 60             | 6-deoxyjacareubin   | the stem bark <i>Garcinia nigrolinaeta</i>                                                                                                                                                      |    | MRSA                              | 4                              | 20            |
| 61             | Toxyloxanthone C    | <i>Cudrania cochinchinensis</i>                                                                                                                                                                 |   | <i>Bacillus subtilis</i>          | 3.13                           | 44,60         |
|                |                     |                                                                                                                                                                                                 |                                                                                       | MRSA                              | 3.13-6.25                      |               |
|                |                     |                                                                                                                                                                                                 |                                                                                       | <i>Enterococci faecalis</i>       | 12.5-25                        |               |
|                |                     |                                                                                                                                                                                                 |                                                                                       | MRSA                              | 3.13-6.25                      |               |
|                |                     |                                                                                                                                                                                                 |                                                                                       | <i>Micrococcus luteus</i>         | 12.5                           |               |
| Biprenyl group |                     |                                                                                                                                                                                                 |                                                                                       |                                   |                                |               |
| 62             | $\alpha$ -mangostin | the fruits, inflorescences, flowers of <i>Garcinia cowa</i> ; the twigs of <i>Garcinia staudtii</i> ; <i>Tetragonula laeviceps</i> propolis; <i>Garcinia fusca</i> ; <i>Garcinia mangostana</i> |  | <i>Micrococcus luteus</i>         | 1\6.25                         | 1-3,          |
|                |                     |                                                                                                                                                                                                 |                                                                                       | <i>Staphylococcus aureus</i>      | 64\4\3.13\25\12.5\8\794\64\128 | 8,13, 19,27,3 |
|                |                     |                                                                                                                                                                                                 |                                                                                       | <i>Staphylococcus epidermidis</i> | 0.5\1.56                       | 7, 46-47, 54- |

|    |                     |                                                                                                                     |                                                                                       |                                                                                                                                                                                                                                                                                                                                                                                   |                                                                                                                                                                                               |                              |
|----|---------------------|---------------------------------------------------------------------------------------------------------------------|---------------------------------------------------------------------------------------|-----------------------------------------------------------------------------------------------------------------------------------------------------------------------------------------------------------------------------------------------------------------------------------------------------------------------------------------------------------------------------------|-----------------------------------------------------------------------------------------------------------------------------------------------------------------------------------------------|------------------------------|
|    |                     |                                                                                                                     |                                                                                       | <i>Bacillus cereus</i><br>MRSA<br><i>Listeria monocytogenes</i><br><i>Streptococcus pyogenes</i><br><i>Escherichia coli</i><br><i>Serratia marcescens</i><br><i>Helicobacter pylori</i><br><i>Bacillus subtilis</i><br><i>Salmonella typhimurium</i><br><i>Pseudomonas aeruginosa</i><br>VRE<br><i>Enterococcus faecalis</i><br><i>Salmonella typhi</i><br><i>Shigella sonnei</i> | 250\8\3.13\0.5<br>32\3.13\8\2\25\12.5\6.25\16\2.34<br>0.78<br>0.78<br>12.5\64\250\25\128<br>12.5<br>19\76.1<br>8\2.34\0.25<br>64\12.5\128<br>2.34\128\12.5<br>3.13\150<br>150<br>18.75<br>150 | 55                           |
| 63 | $\beta$ -mangostine | the fruits, inflorescences and flowers of <i>Garcinia cowa</i> ; <i>Garcinia mangostana</i> ; <i>Garcinia fusca</i> | 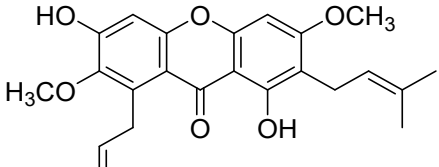 | MRSA<br><i>Staphylococcus aureus</i>                                                                                                                                                                                                                                                                                                                                              | 8\6.25\4.68\>200\64<br>12.5\6.25\25\64\>128\128                                                                                                                                               | 1-2, 8, 13, 27, 46-47, 54-55 |

|    |                     |                                                                      |                                                                                      |                                                                                                                                                                                                                                                                                                                                             |                                                                                                             |                |
|----|---------------------|----------------------------------------------------------------------|--------------------------------------------------------------------------------------|---------------------------------------------------------------------------------------------------------------------------------------------------------------------------------------------------------------------------------------------------------------------------------------------------------------------------------------------|-------------------------------------------------------------------------------------------------------------|----------------|
|    |                     |                                                                      |                                                                                      | <i>Escherichia coli</i><br><i>Bacillus cereus</i><br><i>Bacillus subtilis</i><br><i>Micrococcus luteus</i><br><i>Pseudomonas aeruginosa</i><br><i>Salmonella typhimurium</i><br><i>Staphylococcus epidermidis</i><br><i>Enterococcus faecalis</i><br><i>Salmonella typhi</i><br><i>Shigella sonnei</i><br><i>Helicobacter pylori</i><br>VRE | >128\25<br>0.25\16<br>4\2..34<br>16<br>128\9.37<br>64<br>2<br>300<br>>300<br>>300<br>18.3\183\147.3<br>>200 |                |
| 64 | $\gamma$ -mangostin | <i>Tetragonula laeviceps</i> propolis;<br><i>Garcinia mangostana</i> | 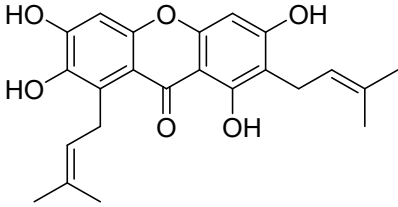 | MRSA<br><i>Bacillus subtilis</i><br><i>Enterococcus faecalis</i><br><i>Salmonella typhi</i><br><i>Shigella sonnei</i><br><i>Pseudomonas aeruginosa</i><br><i>Bacillus cereus</i>                                                                                                                                                            | 4.68\3.13\6.25\12.5<br>18.75<br>9.37<br>18.75<br>18.75<br>18.75\25<br>25                                    | 8,37,<br>54-55 |



|    |                     |                                         |                                                                                       |                                                                                                                                                                                                                                                                   |                                                               |       |
|----|---------------------|-----------------------------------------|---------------------------------------------------------------------------------------|-------------------------------------------------------------------------------------------------------------------------------------------------------------------------------------------------------------------------------------------------------------------|---------------------------------------------------------------|-------|
|    |                     |                                         |                                                                                       | <i>Listeria monocytogenes</i><br><i>Micrococcus luteus</i><br><i>Staphylococcus epidermidis</i><br><i>Streptococcus pyogenes</i><br><i>Escherichia coli</i><br><i>Salmonella typhimurium</i><br><i>Serratia marcescens</i><br><i>Staphylococcus aureus</i><br>VRE | 12.5<br>25<br>25<br>6.25<br>25<br>25<br>25<br>6.25\25<br>6.25 |       |
| 65 | Dulxisanthone       |                                         | 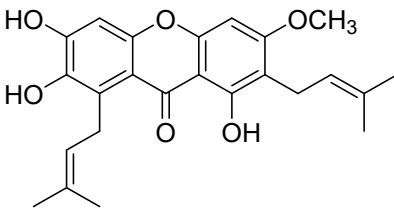  | MRSA<br><i>Bacillus subtilis</i><br><i>Enterococcus faecalis</i><br>VRE<br><i>Salmonella typhi</i><br><i>Shigella sonnei</i><br><i>Pseudomonas aeruginosa</i>                                                                                                     | 9.37<br>18.75<br>300<br>300<br>150<br>150<br>18.75            | 8     |
| 66 | 6-deoxy-γ-mangostin | Calophyllum; <i>Garcinia mangostana</i> |  | <i>Staphylococcus aureus</i>                                                                                                                                                                                                                                      | 250                                                           | 16,55 |

|    |                       |                                                                             |                                                                                       |                               |           |             |
|----|-----------------------|-----------------------------------------------------------------------------|---------------------------------------------------------------------------------------|-------------------------------|-----------|-------------|
|    |                       |                                                                             |                                                                                       | MRSA                          | >250      |             |
|    |                       |                                                                             |                                                                                       | VRE                           | >250      |             |
| 67 | Fuscaxanthone C       | the fruits and flowers of <i>Garcinia cowa</i> ; <i>Garcinia mangostana</i> | 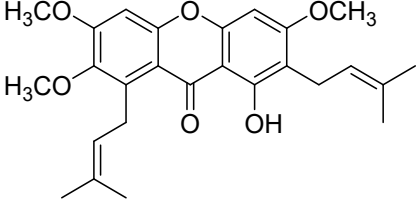   | <i>Bacillus subtilis</i>      | 128       | 1,47,<br>55 |
|    |                       |                                                                             |                                                                                       | <i>Pseudomonas aeruginosa</i> | 128       |             |
|    |                       |                                                                             |                                                                                       | <i>Bacillus cereus</i>        | >128      |             |
|    |                       |                                                                             |                                                                                       | <i>Staphylococcus aureus</i>  | 128       |             |
|    |                       |                                                                             |                                                                                       | <i>Escherichia coli</i>       | 64        |             |
|    |                       |                                                                             |                                                                                       | <i>Salmonella typhimurium</i> | 128       |             |
|    |                       |                                                                             |                                                                                       | MRSA                          | >200      |             |
|    |                       |                                                                             |                                                                                       | VRE                           | >200      |             |
| 68 | Cowaxanthone B        | the fruits of <i>Garcinia cowa</i>                                          |   | MRSA                          | 18.75\128 | 13          |
|    |                       |                                                                             |                                                                                       | <i>Bacillus subtilis</i>      | 75        |             |
|    |                       |                                                                             |                                                                                       | <i>Enterococcus faecalis</i>  | 75        |             |
|    |                       |                                                                             |                                                                                       | VRE                           |           |             |
|    |                       |                                                                             |                                                                                       | <i>Salmonella typhi</i>       | 150       |             |
|    |                       |                                                                             |                                                                                       | <i>Shigella sonnei</i>        | 150       |             |
|    |                       |                                                                             |                                                                                       | <i>Pseudomonas aeruginosa</i> | 18.75     |             |
|    |                       |                                                                             |                                                                                       | <i>Staphylococcus aureus</i>  | 128       |             |
| 69 | 6-methoxy-γ-mangostin |                                                                             |  | MRSA                          | >200      | 55          |

|    |                                       |                                                                                                                             |                                                                                       |                                                                                                                                                                                                                             |                          |                   |
|----|---------------------------------------|-----------------------------------------------------------------------------------------------------------------------------|---------------------------------------------------------------------------------------|-----------------------------------------------------------------------------------------------------------------------------------------------------------------------------------------------------------------------------|--------------------------|-------------------|
|    |                                       |                                                                                                                             |                                                                                       | <i>Bacillus subtilis</i><br>75<br><i>Enterococcus faecalis</i><br>75<br>VRE<br>>200<br><i>Salmonella typhi</i><br>37.5<br><i>Shigella sonnei</i><br>75<br><i>Pseudomonas aeruginosa</i><br>4.67                             |                          |                   |
| 70 | 3,6-di-O-methyl- $\gamma$ - Mangostin | the fruits and flowers of <i>Garcinia cowa</i>                                                                              | 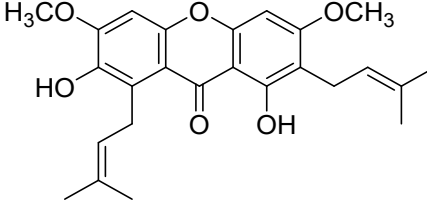   | <i>Bacillus cereus</i><br>128<br><i>Bacillus subtilis</i><br>128<br><i>Staphylococcus aureus</i><br>>128<br><i>Escherichia coli</i><br>>128<br><i>Salmonella typhimurium</i><br>128<br><i>Pseudomonas aeruginosa</i><br>128 | 47                       |                   |
| 71 | Staudtixanthone A                     | the twigs of <i>Garcinia staudtii</i>                                                                                       |   | MRSA                                                                                                                                                                                                                        | 16                       | 19                |
| 72 | Gartanin                              | the twigs of <i>Garcinia staudtii</i> ; <i>Tetragonula laeviceps</i> propolis; the bark of <i>Garcinia mangostana</i> ; the |  | MRSA                                                                                                                                                                                                                        | 32\12.5\>125\>128<br>\25 | 19, 37-38, 42, 54 |

|    |                    |                                                                    |                                                                                       |                                   |               |    |
|----|--------------------|--------------------------------------------------------------------|---------------------------------------------------------------------------------------|-----------------------------------|---------------|----|
|    |                    | twigs of <i>Garcinia propinqua</i> ;<br><i>Garcinia mangostana</i> |                                                                                       | <i>Bacillus cereus</i>            | 25            |    |
|    |                    |                                                                    |                                                                                       | <i>Listeria monocytogenes</i>     | 12.5          |    |
|    |                    |                                                                    |                                                                                       | <i>Micrococcus luteus</i>         | 25            |    |
|    |                    |                                                                    |                                                                                       | <i>Staphylococcus aureus</i>      | 12.5\128\>125 |    |
|    |                    |                                                                    |                                                                                       | <i>Staphylococcus epidermidis</i> | 25            |    |
|    |                    |                                                                    |                                                                                       | <i>Streptococcus pyogenes</i>     | 6.25          |    |
|    |                    |                                                                    |                                                                                       | <i>Escherichia coli</i>           | 25\128        |    |
|    |                    |                                                                    |                                                                                       | <i>Pseudomonas aeruginosa</i>     | 25            |    |
|    |                    |                                                                    |                                                                                       | <i>Salmonella typhimurium</i>     | 25            |    |
|    |                    |                                                                    |                                                                                       | <i>Serratia marcescens</i>        | 25            |    |
|    |                    |                                                                    |                                                                                       | <i>Vibrio vulnificus</i>          | 62.4          |    |
|    |                    |                                                                    |                                                                                       | <i>Vibrio rotiferianus</i>        | 125           |    |
|    |                    |                                                                    |                                                                                       | <i>Vibrio campbellii</i>          | 125           |    |
|    |                    |                                                                    |                                                                                       | <i>Staphylococcus typhimurium</i> | 128           |    |
| 73 | Doitunggarcinone C | the twigs of <i>Garcinia propinqua</i>                             | 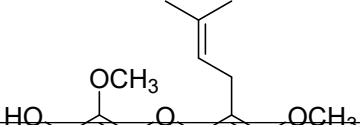 | MRSA                              | 128           | 42 |
|    |                    |                                                                    |                                                                                       | <i>Staphylococcus aureus</i>      | 128           |    |

|    |                             |                                           |                                                                                       |                                   |             |    |
|----|-----------------------------|-------------------------------------------|---------------------------------------------------------------------------------------|-----------------------------------|-------------|----|
|    |                             |                                           |                                                                                       | <i>Escherichia coli</i>           | 128         |    |
|    |                             |                                           |                                                                                       | <i>Staphylococcus typhimurium</i> | \           |    |
| 74 | Dulxanthone B               | the twigs of <i>Garcinia propinqua</i>    | 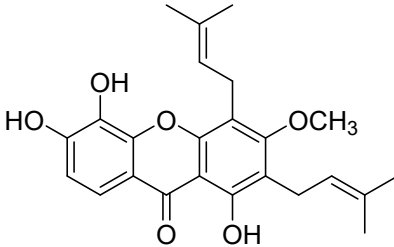   | MRSA                              | 16          | 42 |
|    |                             |                                           |                                                                                       | <i>Staphylococcus aureus</i>      | 32          |    |
|    |                             |                                           |                                                                                       | <i>Escherichia coli</i>           | 128         |    |
|    |                             |                                           |                                                                                       | <i>Staphylococcus typhimurium</i> | 128         |    |
| 75 | Globuliferin                | the seeds of <i>Symphonia globulifera</i> |    | <i>Staphylococcus aureus</i>      | 0.58        | 25 |
|    |                             |                                           |                                                                                       | <i>Streptococcus feacalis</i>     | 8.25        |    |
|    |                             |                                           |                                                                                       | <i>Klebsiella pneumonia</i>       | 15.24       |    |
|    |                             |                                           |                                                                                       | <i>Escherichia coli</i>           | 21.2        |    |
| 76 | 3,5-Di-O-methylglobuliferin | the seeds of <i>Symphonia globulifera</i> |   | <i>Staphylococcus aureus</i>      | \           | 25 |
|    |                             |                                           |                                                                                       | <i>Streptococcus feacalis</i>     | \           |    |
|    |                             |                                           |                                                                                       | <i>Klebsiella pneumonia</i>       | \           |    |
|    |                             |                                           |                                                                                       | <i>Escherichia coli</i>           | \           |    |
| 77 | 8-hydroxy-cudraxanthone G   |                                           |  | <i>Escherichia coli</i>           | >512\64\128 | 21 |
|    |                             |                                           |                                                                                       | <i>Enterobacter aerogenes</i>     | >512\64\128 |    |
|    |                             |                                           |                                                                                       | <i>Klebsiella</i>                 | >512        |    |

|    |                    |                                            |                                                                                     |                                   |          |    |
|----|--------------------|--------------------------------------------|-------------------------------------------------------------------------------------|-----------------------------------|----------|----|
|    |                    |                                            |                                                                                     | <i>pneumoniae</i>                 |          |    |
|    |                    |                                            |                                                                                     | <i>Providencia stuartii</i>       | >512     |    |
|    |                    |                                            |                                                                                     | <i>Pseudomonas aeruginosa</i>     | >512\256 |    |
| 78 | Doitunggarcinone D | the roots of <i>Garcinia propinqua</i>     | 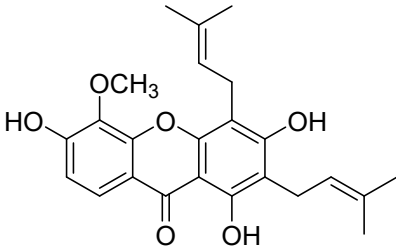 | <i>Bacillus cereus</i>            | 64       | 43 |
|    |                    |                                            |                                                                                     | <i>Bacillus subtilis</i>          | 16       |    |
|    |                    |                                            |                                                                                     | <i>Escherichia coli</i>           | 128      |    |
|    |                    |                                            |                                                                                     | <i>Staphylococcus typhimurium</i> | 128      |    |
| 79 | 8-Deoxygartanin    | the leaves of <i>Garcinia nigrolineata</i> |  | <i>Staphylococcus aureus</i>      | 16\128   | 48 |
|    |                    |                                            |                                                                                     | <i>Micrococcus luteus</i>         | >128     |    |
|    |                    |                                            |                                                                                     | <i>Streptococcus mutans</i>       | 128      |    |
|    |                    |                                            |                                                                                     | <i>Staphylococcus epidermidis</i> | 128      |    |
|    |                    |                                            |                                                                                     | <i>Bacillus cereus</i>            | 128\3.13 |    |
|    |                    |                                            |                                                                                     | MRSA                              | 125\16   |    |
|    |                    |                                            |                                                                                     | <i>Salmonella typhimurium</i>     | 128      |    |
|    |                    |                                            |                                                                                     | <i>Pseudomonas aeruginosa</i>     | >128     |    |
|    |                    |                                            |                                                                                     | <i>Escherichia coli</i>           | >128     |    |
|    |                    |                                            |                                                                                     | <i>Shigella flexneri</i>          | 128      |    |

|    |                  |                                                                          |                                                                                       |                               |                |       |
|----|------------------|--------------------------------------------------------------------------|---------------------------------------------------------------------------------------|-------------------------------|----------------|-------|
|    |                  |                                                                          |                                                                                       | <i>Vibrio vulnificus</i>      | >125           |       |
|    |                  |                                                                          |                                                                                       | <i>Vibrio rotiferianus</i>    | >125           |       |
|    |                  |                                                                          |                                                                                       | <i>Vibrio campbellii</i>      | 125            |       |
| 80 | Smeathxanthone A | <i>Garcinia smeathmannii</i>                                             | 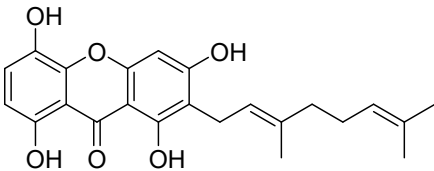   | <i>Escherichia coli</i>       | 128\64\32      | 21,53 |
|    |                  |                                                                          |                                                                                       | <i>Enterobacter aerogenes</i> | >512\256       |       |
|    |                  |                                                                          |                                                                                       | <i>Klebsiella pneumoniae</i>  | >512           |       |
|    |                  |                                                                          |                                                                                       | <i>Providencia stuartii</i>   | >512           |       |
|    |                  |                                                                          |                                                                                       | <i>Pseudomonas aeruginosa</i> | >512\256       |       |
|    |                  |                                                                          |                                                                                       | <i>Staphylococcus aureus</i>  | 32             |       |
|    |                  |                                                                          |                                                                                       | <i>Enterococcus faecalis</i>  | 16             |       |
|    |                  |                                                                          |                                                                                       | <i>Bacillus cereus</i>        | 64             |       |
|    |                  |                                                                          |                                                                                       | <i>Salmonella typhimurium</i> | 256            |       |
| 81 | Cowaxanthone     | the fruits and flowers of <i>Garcinia cowa</i> ; <i>Garcinia fusca</i> ; |  | MRSA                          | 16             | 1,    |
|    |                  |                                                                          |                                                                                       | <i>Staphylococcus aureus</i>  | 16\>128        | 46-47 |
|    |                  |                                                                          |                                                                                       | <i>Escherichia coli</i>       | 128\>128       |       |
|    |                  |                                                                          |                                                                                       | <i>Salmonella typhimurium</i> | 128            |       |
|    |                  |                                                                          |                                                                                       | <i>Helicobacter pylori</i>    | 0.77\3.2\25.64 |       |

|    |                      |                                 |                                                                                       |                               |           |       |
|----|----------------------|---------------------------------|---------------------------------------------------------------------------------------|-------------------------------|-----------|-------|
|    |                      |                                 |                                                                                       | <i>Bacillus cereus</i>        | 64        |       |
|    |                      |                                 |                                                                                       | <i>Bacillus subtilis</i>      | 64        |       |
|    |                      |                                 |                                                                                       | <i>Pseudomonas aeruginosa</i> | 128       |       |
| 82 | Pruniflorone C       | <i>Cratoxylum formosum</i>      | 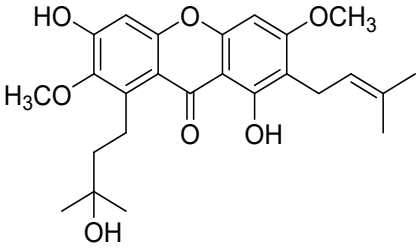   | MRSA                          | 18.75     | 8     |
|    |                      |                                 |                                                                                       | <i>Bacillus subtilis</i>      | 9.37      |       |
|    |                      |                                 |                                                                                       | <i>Enterococcus faecalis</i>  | 150       |       |
|    |                      |                                 |                                                                                       | VRE                           | >300      |       |
|    |                      |                                 |                                                                                       | <i>Salmonella typhi</i>       | 300       |       |
|    |                      |                                 |                                                                                       | <i>Shigella sonnei</i>        | 300       |       |
|    |                      |                                 |                                                                                       | <i>Pseudomonas aeruginosa</i> | 18.75     |       |
| 83 | Nigrolineaxanthone N | <i>Garcinia nigrolineata</i>    |   | MRSA                          | 128       | 20    |
| 84 | Isoalvaxanthone      | <i>Cudrania cochinchinensis</i> |  | <i>Enterococci faecalis</i>   | 6.25\12.5 | 44,60 |
|    |                      |                                 |                                                                                       | <i>Bacillus subtilis</i>      | 12.5      |       |
|    |                      |                                 |                                                                                       | <i>Staphylococcus aureus</i>  | 6.25      |       |
|    |                      |                                 |                                                                                       | MRSA                          | 3.13-6.25 |       |



|    |                   |                                             |                                                                                       |                                   |           |       |
|----|-------------------|---------------------------------------------|---------------------------------------------------------------------------------------|-----------------------------------|-----------|-------|
|    |                   |                                             |                                                                                       | <i>Micrococcus lutes</i>          | 6.25      |       |
| 85 | Cudraxanthone L   | the roots of <i>Garcinia propinqua</i>      | 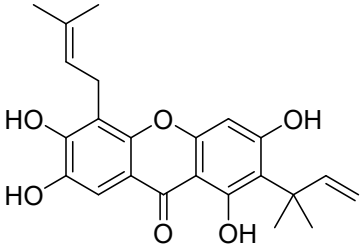   | <i>Bacillus cereus</i>            | 8         | 43    |
|    |                   |                                             |                                                                                       | <i>Bacillus subtilis</i>          | 1         |       |
|    |                   |                                             |                                                                                       | <i>Escherichia coli</i>           | 128       |       |
|    |                   |                                             |                                                                                       | <i>Staphylococcus typhimurium</i> | 64        |       |
| 86 | Alvaxanthone      | <i>Cudrania cochinchinensis</i>             |    | <i>Enterococci faecalis</i>       | 12.5\6.25 | 44,60 |
|    |                   |                                             |                                                                                       | <i>Bacillus subtilis</i>          | 12.5      |       |
|    |                   |                                             |                                                                                       | <i>Staphylococcus aureus</i>      | 6.25      |       |
|    |                   |                                             |                                                                                       | MRSA                              | 6.25\12.5 |       |
|    |                   |                                             |                                                                                       | <i>Micrococcus lutes</i>          | 12.5      |       |
| 87 | Gerontoxanthone I | <i>Cratoxylum</i> species                   |   | <i>Enterococci faecalis</i>       | 6.25\3.13 | 32    |
|    |                   |                                             |                                                                                       | <i>Bacillus subtilis</i>          | 6.25\2.3  |       |
|    |                   |                                             |                                                                                       | <i>Staphylococcus aureus</i>      | 3.13\1.1  |       |
|    |                   |                                             |                                                                                       | MRSA                              | 3.13\6.25 |       |
|    |                   |                                             |                                                                                       | <i>Micrococcus lutes</i>          | 6.25      |       |
|    |                   |                                             |                                                                                       | <i>Pseudomonas aeruginosa</i>     | >50       |       |
|    |                   |                                             |                                                                                       | <i>Salmonella faecalis</i>        | 4.6       |       |
|    |                   |                                             |                                                                                       | <i>Salmonella typhi</i>           | 1.1       |       |
| 88 | Cheffouxanthone   | <i>Garcinia smeathmannii</i> ; the twigs of |  | MRSA                              | 64        | 14,53 |

|    |               |                                                                                                                          |                                                                                     |                                   |                   |         |
|----|---------------|--------------------------------------------------------------------------------------------------------------------------|-------------------------------------------------------------------------------------|-----------------------------------|-------------------|---------|
|    |               | <i>Garcinia hombroniana</i>                                                                                              |                                                                                     | <i>Staphylococcus aureus</i>      | 16\64             |         |
|    |               |                                                                                                                          |                                                                                     | <i>Enterococcus faecalis</i>      | 8                 |         |
|    |               |                                                                                                                          |                                                                                     | <i>Bacillus cereus</i>            | 32                |         |
|    |               |                                                                                                                          |                                                                                     | <i>Pseudomonas aeruginosa</i>     | 128               |         |
|    |               |                                                                                                                          |                                                                                     | <i>Escherichia coli</i>           | 64                |         |
|    |               |                                                                                                                          |                                                                                     | <i>Salmonella typhimurium</i>     | \                 |         |
| 89 | Rubraxanthone | the fruits and flowers of <i>Garcinia cowa</i> ; the stem bark of <i>Allanblackia monticola</i> ; <i>Garcinia dioica</i> | 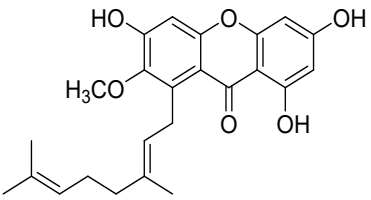 | <i>Bacillus cereus</i>            | 2\1000\0.313-1.25 | 2-3,    |
|    |               |                                                                                                                          |                                                                                     | <i>Bacillus subtilis</i>          | 1                 | 12,47,5 |
|    |               |                                                                                                                          |                                                                                     | <i>Micrococcus luteus</i>         | 2                 | 4       |
|    |               |                                                                                                                          |                                                                                     | <i>Staphylococcus aureus</i>      | >128\1000         |         |
|    |               |                                                                                                                          |                                                                                     | <i>Escherichia coli</i>           | 64\794            |         |
|    |               |                                                                                                                          |                                                                                     | <i>Salmonella typhimurium</i>     | 64                |         |
|    |               |                                                                                                                          |                                                                                     | <i>Staphylococcus epidermidis</i> | 4                 |         |
|    |               |                                                                                                                          |                                                                                     | <i>Staphylococcus aureus</i>      | 12                |         |
|    |               |                                                                                                                          |                                                                                     | <i>Vibrio anguillarum</i>         | \                 |         |
|    |               |                                                                                                                          |                                                                                     | <i>Candida tropicalis</i>         | \                 |         |
|    |               |                                                                                                                          |                                                                                     | <i>Pseudomonas aeruginosa</i>     | 64                |         |

|    |                                        |                                     |                                                                                       |                                   |            |       |
|----|----------------------------------------|-------------------------------------|---------------------------------------------------------------------------------------|-----------------------------------|------------|-------|
|    |                                        |                                     |                                                                                       | MRSA                              | 0.313\1.25 |       |
| 90 | Nigrolineaxanthone Z                   | <i>Garcinia nigrolinaeta</i>        | 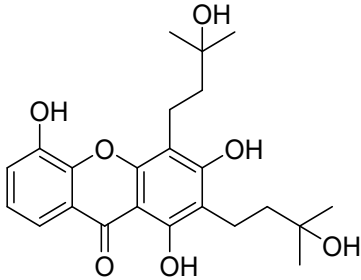   | <i>Micrococcus luteus</i>         | >128       | 4     |
|    |                                        |                                     |                                                                                       | <i>Streptococcus mutans</i>       | 128        |       |
|    |                                        |                                     |                                                                                       | <i>Staphylococcus epidermidis</i> | 128        |       |
|    |                                        |                                     |                                                                                       | <i>Bacillus cereus</i>            | 128        |       |
|    |                                        |                                     |                                                                                       | <i>Staphylococcus aureus</i>      | 128        |       |
|    |                                        |                                     |                                                                                       | <i>Salmonella typhimurium</i>     | 128        |       |
|    |                                        |                                     |                                                                                       | <i>Pseudomonas aeruginosa</i>     | >128       |       |
|    |                                        |                                     |                                                                                       | <i>Escherichia coli</i>           | 128        |       |
|    |                                        |                                     |                                                                                       | <i>Shigella flexneri</i>          | 128        |       |
| 91 | Gerontoxanthone H<br>(Cudraxanthone H) | <i>Cudrania cachinchinensis</i>     |   | <i>Enterococci faecalis</i>       | 1.56       | 44,60 |
|    |                                        |                                     |                                                                                       | <i>Bacillus subtilis</i>          | 1.56       |       |
|    |                                        |                                     |                                                                                       | <i>Staphylococcus aureus</i>      | 1.56       |       |
|    |                                        |                                     |                                                                                       | MRSA                              | 1.56       |       |
|    |                                        |                                     |                                                                                       | <i>Micrococcus lutes</i>          | 1.56       |       |
| 92 | Dulcisxanthone G                       | the seeds of <i>Garcinia dulcis</i> |  | MRSA                              | >128       | 18    |
|    |                                        |                                     |                                                                                       | <i>Staphylococcus aureus</i>      | >128       |       |

|    |                                            |                                         |                                                                                       |                                   |        |    |
|----|--------------------------------------------|-----------------------------------------|---------------------------------------------------------------------------------------|-----------------------------------|--------|----|
| 93 | Morusignin                                 |                                         | 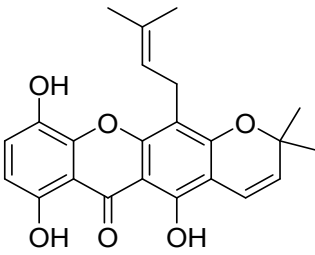   | <i>Escherichia coli</i>           | 64\128 | 21 |
|    |                                            |                                         |                                                                                       | <i>Enterobacter aerogenes</i>     | >512   |    |
|    |                                            |                                         |                                                                                       | <i>Klebsiella pneumoniae</i>      | >512   |    |
|    |                                            |                                         |                                                                                       | <i>Providencia stuartii</i>       | >512   |    |
|    |                                            |                                         |                                                                                       | <i>Pseudomonas aeruginosa</i>     | 128\64 |    |
| 94 | Cudraxanthone Q                            | the roots of <i>Garcinia propinqua</i>  |    | <i>Bacillus cereus</i>            | 128    | 43 |
|    |                                            |                                         |                                                                                       | <i>Bacillus subtilis</i>          | 128    |    |
|    |                                            |                                         |                                                                                       | <i>Escherichia coli</i>           | 128    |    |
|    |                                            |                                         |                                                                                       | <i>Staphylococcus typhimurium</i> | 128    |    |
| 95 | 5- <i>O</i> -methylxanthone V <sub>1</sub> | the twigs of <i>Garcinia propinqua</i>  |   | MRSA                              | >128   | 42 |
|    |                                            |                                         |                                                                                       | <i>Staphylococcus aureus</i>      | >128   |    |
|    |                                            |                                         |                                                                                       | <i>Escherichia coli</i>           | 128    |    |
|    |                                            |                                         |                                                                                       | <i>Staphylococcus typhimurium</i> | 128    |    |
| 96 | Xanthone V <sub>1</sub>                    | the roots of <i>Cratoxylum formosum</i> |  | <i>Pseudomonas aeruginosa</i>     | 9.3    | 32 |
|    |                                            |                                         |                                                                                       | <i>Bacillus subtilis</i>          | 1.1    |    |
|    |                                            |                                         |                                                                                       | <i>Staphylococcus aureus</i>      | 1.1    |    |

|    |                                           |                                                                                        |                                                                                       |                                   |        |        |
|----|-------------------------------------------|----------------------------------------------------------------------------------------|---------------------------------------------------------------------------------------|-----------------------------------|--------|--------|
|    |                                           |                                                                                        |                                                                                       | <i>Streptococcus faecalis</i>     | 1.1    |        |
|    |                                           |                                                                                        |                                                                                       | <i>Salmonella typhi</i>           | 1.1    |        |
| 97 | Toxyloxanthone A<br>(Trapezifolixanthone) | <i>Garcinia tetralata</i>                                                              | 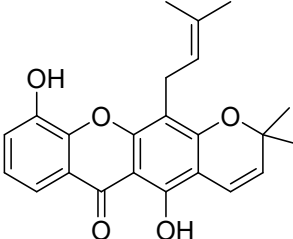   | <i>Micrococcus luteus</i>         | 128    | 4      |
|    |                                           |                                                                                        |                                                                                       | <i>Streptococcus mutans</i>       | 128    |        |
|    |                                           |                                                                                        |                                                                                       | <i>Staphylococcus epidermidis</i> | 128    |        |
|    |                                           |                                                                                        |                                                                                       | <i>Bacillus cereus</i>            | 128    |        |
|    |                                           |                                                                                        |                                                                                       | <i>Staphylococcus aureus</i>      | 128    |        |
|    |                                           |                                                                                        |                                                                                       | <i>Salmonella typhimurium</i>     | 128    |        |
|    |                                           |                                                                                        |                                                                                       | <i>Pseudomonas aeruginosa</i>     | 128    |        |
|    |                                           |                                                                                        |                                                                                       | <i>Escherichia coli</i>           | >128   |        |
|    |                                           |                                                                                        |                                                                                       | <i>Shigella flexneri</i>          | 128    |        |
|    |                                           |                                                                                        |                                                                                       | <i>Bacillus cereus</i>            | 16     |        |
|    |                                           |                                                                                        |                                                                                       | <i>Bacillus subtilis</i>          | 4      |        |
|    |                                           |                                                                                        |                                                                                       | <i>Escherichia coli</i>           | 128    |        |
|    |                                           |                                                                                        |                                                                                       | <i>Staphylococcus typhimurium</i> | 128    |        |
| 98 | 9-hydroxy-calabaxanthone                  | the bark of <i>Garcinia mangostana</i> ;<br>the inflorescences of <i>Garcinia cowa</i> |  | MRSA                              | >125\4 | 27, 38 |
|    |                                           |                                                                                        |                                                                                       | <i>Vibrio vulnificus</i>          | >125   |        |
|    |                                           |                                                                                        |                                                                                       | <i>Vibrio rotiferianus</i>        | 125    |        |
|    |                                           |                                                                                        |                                                                                       | <i>Vibrio campbellii</i>          | 125    |        |

|     |                        |                                                |                                                                                      |                               |      |    |
|-----|------------------------|------------------------------------------------|--------------------------------------------------------------------------------------|-------------------------------|------|----|
|     |                        |                                                |                                                                                      | <i>Staphylococcus aureus</i>  | 4    |    |
| 99  | Demethylcalabaxanthone | the twigs of <i>Garcinia staudtii</i>          | 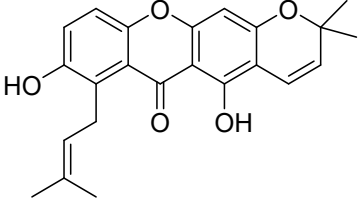  | MRSA                          | 128  | 19 |
| 100 | Garciniacowone E       | the fruits and flowers of <i>Garcinia cowa</i> |   | <i>Bacillus cereus</i>        | 128  | 47 |
|     |                        |                                                |                                                                                      | <i>Bacillus subtilis</i>      | 128  |    |
|     |                        |                                                |                                                                                      | <i>Staphylococcus aureus</i>  | >128 |    |
|     |                        |                                                |                                                                                      | <i>Escherichia coli</i>       | >128 |    |
|     |                        |                                                |                                                                                      | <i>Salmonella typhimurium</i> | 128  |    |
|     |                        |                                                |                                                                                      | <i>Pseudomonas aeruginosa</i> | 128  |    |
| 101 | 6-O-methylmangostanin  | the fruits and flowers of <i>Garcinia cowa</i> |  | <i>Bacillus cereus</i>        | 128  | 47 |
|     |                        |                                                |                                                                                      | <i>Bacillus subtilis</i>      | 128  |    |
|     |                        |                                                |                                                                                      | <i>Staphylococcus aureus</i>  | >128 |    |
|     |                        |                                                |                                                                                      | <i>Escherichia coli</i>       | >128 |    |
|     |                        |                                                |                                                                                      | <i>Salmonella typhimurium</i> | 64   |    |
|     |                        |                                                |                                                                                      | <i>Pseudomonas aeruginosa</i> | 128  |    |

|                         |                      |                                                                                                                        |                                                                                     |                                   |              |            |
|-------------------------|----------------------|------------------------------------------------------------------------------------------------------------------------|-------------------------------------------------------------------------------------|-----------------------------------|--------------|------------|
| 102                     | Calothwaitesixanhone | Calophyllum                                                                                                            | 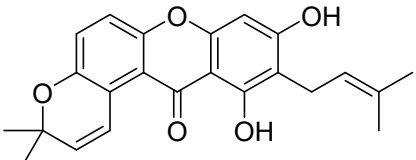 | <i>Staphylococcus aureus</i>      | \            | 16         |
| 103                     | Garcinone B          | the twigs of <i>Garcinia staudtii</i> ; the root of <i>Cratoxylum formosum</i> ; <i>Tetragonula laeviceps</i> propolis |  | <i>MRSA</i>                       | 128\150\6.25 | 19, 29, 37 |
|                         |                      |                                                                                                                        |                                                                                     | <i>Bacillus subtilis</i>          | 75           |            |
|                         |                      |                                                                                                                        |                                                                                     | <i>Staphylococcus aureus</i>      | 75\6.25      |            |
|                         |                      |                                                                                                                        |                                                                                     | <i>Enterococcus faecalis</i>      | 75           |            |
|                         |                      |                                                                                                                        |                                                                                     | VRE                               | 75           |            |
|                         |                      |                                                                                                                        |                                                                                     | <i>Salmonella typhi</i>           | >300         |            |
|                         |                      |                                                                                                                        |                                                                                     | <i>Shigella sonnei</i>            | >300         |            |
|                         |                      |                                                                                                                        |                                                                                     | <i>Pseudomonas aeruginosa</i>     | >300\25      |            |
|                         |                      |                                                                                                                        |                                                                                     | <i>Bacillus cereus</i>            | 3.13         |            |
|                         |                      |                                                                                                                        |                                                                                     | <i>Listeria monocytogenes</i>     | 6.25         |            |
|                         |                      |                                                                                                                        |                                                                                     | <i>Micrococcus luteus</i>         | 3.13         |            |
|                         |                      |                                                                                                                        |                                                                                     | <i>Staphylococcus epidermidis</i> | 3.13         |            |
|                         |                      |                                                                                                                        |                                                                                     | <i>Streptococcus pyogenes</i>     | 1.56         |            |
| <i>Escherichia coli</i> | 25                   |                                                                                                                        |                                                                                     |                                   |              |            |
| <i>Salmonella</i>       | 25                   |                                                                                                                        |                                                                                     |                                   |              |            |

|     |                 |                                                |                                                                                      |                                   |      |               |
|-----|-----------------|------------------------------------------------|--------------------------------------------------------------------------------------|-----------------------------------|------|---------------|
|     |                 |                                                |                                                                                      | <i>typhimurium</i>                |      |               |
|     |                 |                                                |                                                                                      | <i>Serratia marcescens</i>        | 25   |               |
| 104 | Cowaxanthone D  | the fruits and flowers of <i>Garcinia cowa</i> | 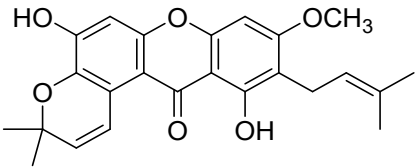  | MRSA                              | 128  | 1-2, 47       |
|     |                 |                                                |                                                                                      | <i>Staphylococcus aureus</i>      | >128 |               |
|     |                 |                                                |                                                                                      | <i>Bacillus cereus</i>            | 64   |               |
|     |                 |                                                |                                                                                      | <i>Bacillus subtilis</i>          | 128  |               |
|     |                 |                                                |                                                                                      | <i>Micrococcus luteus</i>         | 64   |               |
|     |                 |                                                |                                                                                      | <i>Escherichia coli</i>           | >128 |               |
|     |                 |                                                |                                                                                      | <i>Pseudomonas aeruginosa</i>     | 128  |               |
|     |                 |                                                |                                                                                      | <i>Salmonella typhimurium</i>     | 64   |               |
|     |                 |                                                |                                                                                      | <i>Staphylococcus epidermidis</i> | 32   |               |
| 105 | Macluraxanthone | <i>Garcinia propinqua</i>                      |  | MRSA                              | 4    | 29,32, 42, 43 |
|     |                 |                                                |                                                                                      | <i>Staphylococcus aureus</i>      | 4    |               |
|     |                 |                                                |                                                                                      | <i>Escherichia coli</i>           | 128  |               |
|     |                 |                                                |                                                                                      | <i>Staphylococcus typhimurium</i> | \    |               |
|     |                 |                                                |                                                                                      | <i>Bacillus cereus</i>            | 4    |               |
|     |                 |                                                |                                                                                      | <i>Bacillus subtilis</i>          | 4    |               |
|     |                 |                                                |                                                                                      | <i>Escherichia coli</i>           | 128  |               |



|     |                             |                           |                                                                                      |                                                                                                                                                                                                                                                                                            |    |
|-----|-----------------------------|---------------------------|--------------------------------------------------------------------------------------|--------------------------------------------------------------------------------------------------------------------------------------------------------------------------------------------------------------------------------------------------------------------------------------------|----|
|     |                             |                           |                                                                                      | <i>Micrococcus luteus</i> >128<br><i>Bacillus cereus</i> >128<br><i>Bacillus subtilis</i> \<br><i>Staphylococcus aureus</i> >128<br><i>Staphylococcus epidermidis</i> >128<br><i>Escherichia coli</i> >128<br><i>Staphylococcus typhimurium</i> >128<br><i>Pseudomonas aeruginosa</i> >128 |    |
| 106 | 10-O-methylmaclura-xanthone | <i>Garcinia bracteata</i> | 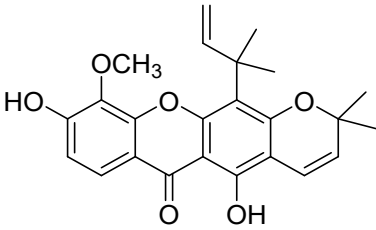 | MRSA 4<br><i>Staphylococcus aureus</i> 2<br><i>Escherichia coli</i> 128<br><i>Staphylococcus typhimurium</i> 128<br><i>Micrococcus luteus</i> >128<br><i>Bacillus cereus</i> >128<br><i>Bacillus subtilis</i> \<br><i>Staphylococcus aureus</i> >128<br><i>Staphylococcus</i> >128         | 42 |

|     |                      |                              |                                                                                       |                                   |      |   |
|-----|----------------------|------------------------------|---------------------------------------------------------------------------------------|-----------------------------------|------|---|
|     |                      |                              |                                                                                       | <i>epidermidis</i>                |      |   |
|     |                      |                              |                                                                                       | <i>Escherichia coli</i>           | >128 |   |
|     |                      |                              |                                                                                       | <i>Staphylococcus typhimurium</i> | >128 |   |
|     |                      |                              |                                                                                       | <i>Pseudomonas aeruginosa</i>     | >128 |   |
| 107 | Nigrolineaxanthone X | <i>Garcinia nigrolineata</i> | 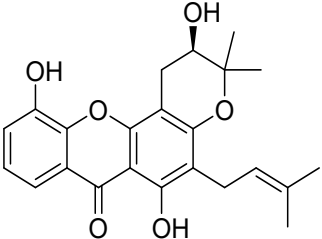   | <i>Micrococcus luteus</i>         | >128 | 4 |
|     |                      |                              |                                                                                       | <i>Streptococcus mutans</i>       | >128 |   |
|     |                      |                              |                                                                                       | <i>Staphylococcus epidermidis</i> | 128  |   |
|     |                      |                              |                                                                                       | <i>Bacillus cereus</i>            | 128  |   |
|     |                      |                              |                                                                                       | <i>Staphylococcus aureus</i>      | 128  |   |
|     |                      |                              |                                                                                       | <i>Salmonella typhimurium</i>     | 128  |   |
|     |                      |                              |                                                                                       | <i>Pseudomonas aeruginosa</i>     | >128 |   |
|     |                      |                              |                                                                                       | <i>Escherichia coli</i>           | >128 |   |
|     |                      |                              |                                                                                       | <i>Shigella flexneri</i>          | >128 |   |
| 108 | Nigrolineaxanthone Q | <i>Garcinia nigrolineata</i> |  | <i>Micrococcus luteus</i>         | 8    | 4 |
|     |                      |                              |                                                                                       | <i>Streptococcus mutans</i>       | 32   |   |
|     |                      |                              |                                                                                       | <i>Staphylococcus epidermidis</i> | 128  |   |
|     |                      |                              |                                                                                       | <i>Bacillus cereus</i>            | 32   |   |

|     |               |                                                                              |                                                                                     |                                   |        |             |
|-----|---------------|------------------------------------------------------------------------------|-------------------------------------------------------------------------------------|-----------------------------------|--------|-------------|
|     |               |                                                                              |                                                                                     | <i>Staphylococcus aureus</i>      | 128    |             |
|     |               |                                                                              |                                                                                     | <i>Salmonella typhimurium</i>     | 128    |             |
|     |               |                                                                              |                                                                                     | <i>Pseudomonas aeruginosa</i>     | 128    |             |
|     |               |                                                                              |                                                                                     | <i>Escherichia coli</i>           | 128    |             |
|     |               |                                                                              |                                                                                     | <i>Shigella flexneri</i>          | 128    |             |
| 109 | Ananixanthone | the leaves of <i>Garcinia nigrolineata</i> ;<br><i>Garcinia smeathmannii</i> | 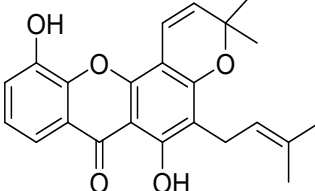 | <i>Micrococcus luteus</i>         | 32     | 4,48,<br>53 |
|     |               |                                                                              |                                                                                     | <i>Streptococcus mutans</i>       | 32     |             |
|     |               |                                                                              |                                                                                     | <i>Staphylococcus epidermidis</i> | 128    |             |
|     |               |                                                                              |                                                                                     | <i>Bacillus cereus</i>            | 32     |             |
|     |               |                                                                              |                                                                                     | <i>Staphylococcus aureus</i>      | 128\32 |             |
|     |               |                                                                              |                                                                                     | <i>Salmonella typhimurium</i>     | 128    |             |
|     |               |                                                                              |                                                                                     | <i>Pseudomonas aeruginosa</i>     | 128    |             |
|     |               |                                                                              |                                                                                     | <i>Escherichia coli</i>           | >128   |             |
|     |               |                                                                              |                                                                                     | <i>Shigella flexneri</i>          | >128   |             |
|     |               |                                                                              |                                                                                     | MRSA                              | 32     |             |
|     |               |                                                                              |                                                                                     | <i>Enterococcus faecalis</i>      | 2      |             |
|     |               |                                                                              |                                                                                     | <i>Pseudomonas</i>                | 64     |             |

|                          |                   |                                                                                        |                                                                                     |                                   |      |    |
|--------------------------|-------------------|----------------------------------------------------------------------------------------|-------------------------------------------------------------------------------------|-----------------------------------|------|----|
|                          |                   |                                                                                        |                                                                                     | <i>aeruginosa</i>                 |      |    |
| 110                      | Morusignin J      | the seeds of <i>Garcinia dulcis</i>                                                    | 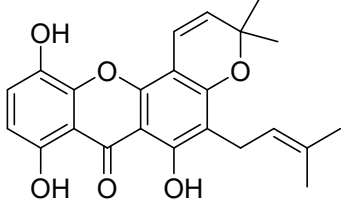 | <i>Staphylococcus aureus</i>      | >128 | 18 |
|                          |                   |                                                                                        |                                                                                     | MRSA                              | >128 |    |
|                          |                   |                                                                                        |                                                                                     | <i>Escherichia coli</i>           | 128  |    |
|                          |                   |                                                                                        |                                                                                     | <i>Staphylococcus typhimurium</i> | \    |    |
| 111                      | Thwaitesixanthone | <i>Calophyllum thwaitesii</i>                                                          |  | <i>Staphylococcus aureus</i>      | \    | 16 |
| 112                      | Brasilixanthone   | the stem bark of <i>Garcinia nigrolineata</i> ; the root of <i>Cratoxylum formosum</i> |  | <i>Bacillus subtilis</i>          | 300  | 29 |
|                          |                   |                                                                                        |                                                                                     | <i>Staphylococcus aureus</i>      | 300  |    |
|                          |                   |                                                                                        |                                                                                     | <i>Enterococcus faecalis</i>      | >300 |    |
|                          |                   |                                                                                        |                                                                                     | MRSA                              | 300  |    |
|                          |                   |                                                                                        |                                                                                     | VRE                               | 2    |    |
|                          |                   |                                                                                        |                                                                                     | <i>Salmonella typhi</i>           | 300  |    |
|                          |                   |                                                                                        |                                                                                     | <i>Shigella sonnei</i>            | >300 |    |
|                          |                   |                                                                                        |                                                                                     | <i>Pseudomonas aeruginosa</i>     | >300 |    |
| <i>Bacillus subtilis</i> | >300              |                                                                                        |                                                                                     |                                   |      |    |

|     |                   |                                                |                                                                                      |                              |     |    |
|-----|-------------------|------------------------------------------------|--------------------------------------------------------------------------------------|------------------------------|-----|----|
| 113 | Staudtixanthone B | the twigs of <i>Garcinia staudtii</i>          | 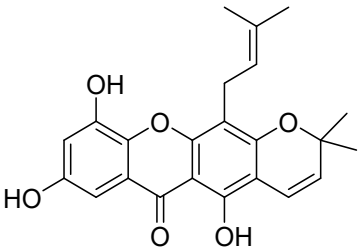  | MRSA                         | 32  | 19 |
| 114 | Caloxanthone A    | <i>Calophyllum inophyllum</i>                  |   | MRSA                         | >25 | 54 |
|     |                   |                                                | <i>Staphylococcus aureus</i>                                                         | 6.25\25                      |     |    |
| 115 | Garciniafuran     | the stem bark of <i>Allanblackia monticola</i> |   | <i>Staphylococcus aureus</i> | \   | 54 |
|     |                   |                                                | <i>Vibrio anguillarum</i>                                                            | \                            |     |    |
|     |                   |                                                | <i>Candida tropicalis</i>                                                            | \                            |     |    |
| 116 | Gerontoxanthone B | <i>Cudrania cochinchinensis</i>                |  | <i>Bacillus subtilis</i>     | >25 | 60 |
|     |                   |                                                | <i>Staphylococcus aureus</i>                                                         | >25                          |     |    |
|     |                   |                                                | <i>Staphylococcus aureus</i>                                                         | 12.5->25                     |     |    |
|     |                   |                                                | <i>Micrococcus lutes</i>                                                             | >25                          |     |    |

|     |                        |                                                |  |                               |      |    |
|-----|------------------------|------------------------------------------------|--|-------------------------------|------|----|
| 117 | Nigrolineaxanthone G   | the stem bark <i>Garcinia nigrolinaeta</i>     |  | MRSA                          | 4    | 20 |
| 118 | Staudtiixanthone C     | <i>Garcinia staudtii</i>                       |  | MRSA                          | 128  | 19 |
| 119 | Hypericumxanthone B    | <i>Hypericum sampsonii</i>                     |  | MRSA                          | 32   | 63 |
| 120 | 3-O-methylmangostenone | the fruits and flowers of <i>Garcinia cowa</i> |  | <i>Bacillus cereus</i>        | 128  | 47 |
|     |                        |                                                |  | <i>Bacillus subtilis</i>      | \    |    |
|     |                        |                                                |  | <i>Staphylococcus aureus</i>  | 128  |    |
|     |                        |                                                |  | <i>Escherichia coli</i>       | >128 |    |
|     |                        |                                                |  | <i>Salmonella typhimurium</i> | 128  |    |
|     |                        |                                                |  | <i>Pseudomonas aeruginosa</i> | >128 |    |
| 121 | Nigrolineaxanthone Q   | <i>Garcinia nigrolineata</i>                   |  | <i>Micrococcus luteus</i>     | 8    | 4  |
|     |                        |                                                |  | <i>Streptococcus mutans</i>   | 32   |    |

|     |                      |                                      |                                                                                       |                                                                                                                                                                                                                      |                                       |    |
|-----|----------------------|--------------------------------------|---------------------------------------------------------------------------------------|----------------------------------------------------------------------------------------------------------------------------------------------------------------------------------------------------------------------|---------------------------------------|----|
|     |                      |                                      |                                                                                       | <i>Staphylococcus epidermidis</i><br><i>Bacillus cereus</i><br><i>Staphylococcus aureus</i><br><i>Salmonella typhimurium</i><br><i>Pseudomonas aeruginosa</i><br><i>Escherichia coli</i><br><i>Shigella flexneri</i> | 128<br>32<br>128<br>128<br>128<br>128 |    |
| 122 | Laurentixanthone A   | the roots of <i>Vismia laurentii</i> | 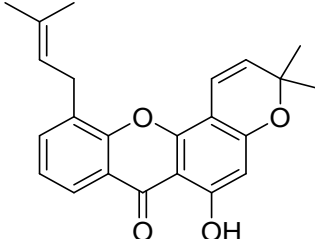   | <i>Candida glabrata</i>                                                                                                                                                                                              | 1                                     | 17 |
| 123 | Nigrolineaxanthone Y | <i>Garcinia nigrolinaeta</i>         |  | <i>Micrococcus luteus</i><br><i>Streptococcus mutans</i><br><i>Staphylococcus epidermidis</i><br><i>Bacillus cereus</i><br><i>Staphylococcus aureus</i><br><i>Salmonella</i>                                         | 32<br>128<br>128<br>64<br>128<br>>128 | 4  |

|     |                   |                                          |                                                                                       |                                   |           |    |
|-----|-------------------|------------------------------------------|---------------------------------------------------------------------------------------|-----------------------------------|-----------|----|
|     |                   |                                          |                                                                                       | <i>typhimurium</i>                |           |    |
|     |                   |                                          |                                                                                       | <i>Pseudomonas aeuruginosa</i>    | 128       |    |
|     |                   |                                          |                                                                                       | <i>Escherichia coli</i>           | 128       |    |
|     |                   |                                          |                                                                                       | <i>Shigella flexneri</i>          | 128       |    |
| 124 | Caloxanthone L    | the roots of <i>Garcinia propinqua</i>   | 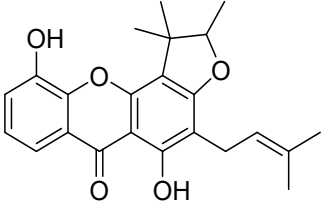   | <i>Bacillus cereus</i>            | 64        | 43 |
|     |                   |                                          |                                                                                       | <i>Bacillus subtilis</i>          | 128       |    |
|     |                   |                                          |                                                                                       | <i>Escherichia coli</i>           | 128       |    |
|     |                   |                                          |                                                                                       | <i>Staphylococcus typhimurium</i> | 128       |    |
| 125 | Gerontoxanthone G | <i>Cudrania cochinchinensis</i>          |    | <i>Bacillus subtilis</i>          | 12.5      | 60 |
|     |                   |                                          |                                                                                       | <i>Staphylococcus aureus</i>      | 12.5      |    |
|     |                   |                                          |                                                                                       | <i>Staphylococcus aureus</i>      | 6.25-12.5 |    |
|     |                   |                                          |                                                                                       | <i>Micrococcus lutes</i>          | 12.5      |    |
| 126 | Gerontoxanthone A | <i>Cudrania cochinchinensis</i>          |   | <i>Bacillus subtilis</i>          | >25       | 60 |
|     |                   |                                          |                                                                                       | <i>Staphylococcus aureus</i>      | >25       |    |
|     |                   |                                          |                                                                                       | <i>Staphylococcus aureus</i>      | >25       |    |
|     |                   |                                          |                                                                                       | <i>Micrococcus lutes</i>          | >25       |    |
| 127 | Bangaxanthone A   | the twigs of <i>Garcinia hombroniana</i> |  | MRSA                              | 32        | 14 |
|     |                   |                                          |                                                                                       | <i>Staphylococcus</i>             | 200       |    |



|     |                     |                                                                           |                                                                                     |                                   |           |         |
|-----|---------------------|---------------------------------------------------------------------------|-------------------------------------------------------------------------------------|-----------------------------------|-----------|---------|
|     |                     |                                                                           |                                                                                     | <i>aureus</i>                     |           |         |
| 128 | Nigrolineaxanthon I | the stem bark <i>Garcinia nigrolinaeta</i>                                | 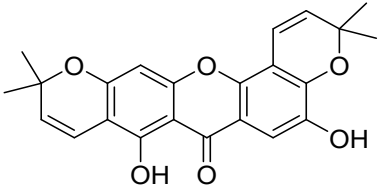 | MRSA                              | 4         | 20      |
| 129 | Staudtiixanthon D   | the twigs of <i>Garcinia staudtii</i>                                     |  | MRSA                              | 64        | 19      |
| 130 | Mangostanin         | <i>Tetragonula laeviceps</i> propolis; the fruits of <i>Garcinia cowa</i> |  | <i>Bacillus cereus</i>            | 12.5\4\8  | 13,37,4 |
|     |                     |                                                                           |                                                                                     | <i>Listeria monocytogenes</i>     | 0.78      | 7       |
|     |                     |                                                                           |                                                                                     | <i>Bacillus subtilis</i>          | 2         |         |
|     |                     |                                                                           |                                                                                     | <i>Micrococcus luteus</i>         | 25\4      |         |
|     |                     |                                                                           |                                                                                     | <i>Staphylococcus aureus</i>      | 12.5\64\4 |         |
|     |                     |                                                                           |                                                                                     | <i>Staphylococcus epidermidis</i> | 25        |         |
|     |                     |                                                                           |                                                                                     | <i>Streptococcus pyogenes</i>     | 3.13      |         |
|     |                     |                                                                           |                                                                                     | MRSA                              | 12.5\4    |         |
|     |                     |                                                                           |                                                                                     | <i>Escherichia coli</i>           | 25        |         |

|                 |                  |                                                               |                                                                                      |                                                                                                                                                                                                                             |      |
|-----------------|------------------|---------------------------------------------------------------|--------------------------------------------------------------------------------------|-----------------------------------------------------------------------------------------------------------------------------------------------------------------------------------------------------------------------------|------|
|                 |                  |                                                               |                                                                                      | <i>Bacillus subtilis</i><br>8<br><i>Salmonella typhimurium</i><br>128<br><i>Pseudomonas aeruginosa</i><br>128                                                                                                               |      |
| 131             | Garciniacowone C | the fruits and flowers of <i>Garcinia cowa</i>                | 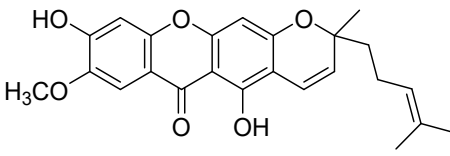  | <i>Bacillus cereus</i><br>32<br><i>Bacillus subtilis</i><br>64<br><i>Staphylococcus aureus</i><br>>128<br><i>Escherichia coli</i><br>>128<br><i>Salmonella typhimurium</i><br>128<br><i>Pseudomonas aeruginosa</i><br>128   | 47   |
| Triprenyl group |                  |                                                               |                                                                                      |                                                                                                                                                                                                                             |      |
| 132             | Norcowanin       | <i>Garcinia cowa</i> ; the root of <i>Cratoxylum formosum</i> |  | <i>Escherichia coli</i><br>64<br><i>Salmonella typhimurium</i><br>128<br><i>Bacillus subtilis</i><br>4.7<br><i>Staphylococcus aureus</i><br>9.37\8<br><i>Enterococcus faecalis</i><br>9.37<br>MRSA<br>18.75\16<br>VRE<br>75 | 1,29 |

|     |         |                                                                            |                                                                                       |                                                                                                                                                                                                                                                                                         |                                                                                   |                      |
|-----|---------|----------------------------------------------------------------------------|---------------------------------------------------------------------------------------|-----------------------------------------------------------------------------------------------------------------------------------------------------------------------------------------------------------------------------------------------------------------------------------------|-----------------------------------------------------------------------------------|----------------------|
|     |         |                                                                            |                                                                                       | <i>Salmonella typhi</i><br><i>Shigella sonnei</i><br><i>Pseudomonas aeruginosa</i>                                                                                                                                                                                                      | >300<br>>300<br>300                                                               |                      |
| 133 | Cowanin | the fruits, inflorescences of <i>Garcinia cowa</i> ; <i>Garcinia fusca</i> | 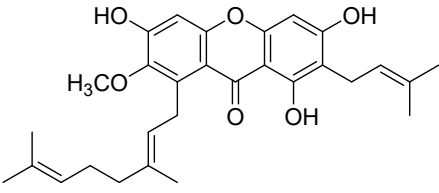   | <i>Staphylococcus aureus</i><br>MRSA<br><i>Escherichia coli</i><br><i>Bacillus cereus</i><br><i>Bacillus subtilis</i><br><i>Micrococcus luteus</i><br><i>Pseudomonas aeruginosa</i><br><i>Salmonella typhimurium</i><br><i>Staphylococcus epidermidis</i><br><i>Helicobacter pylori</i> | 32\128\>128<br>2\>128<br>128\>128<br>32<br>4<br>4<br>128<br>64<br>2<br>29.89\3.73 | 1-2,<br>13,27,4<br>6 |
| 134 | Cowanol | the fruits, inflorescences of <i>Garcinia cowa</i> , <i>Garcinia fusca</i> |  | MRSA<br><i>Staphylococcus aureus</i><br><i>Escherichia coli</i><br><i>Salmonella typhimurium</i>                                                                                                                                                                                        | 2\>128<br>8\>128<br>128<br>128                                                    | 1,13,27<br>,46       |

|     |                 |                                        |                                                                                       |                               |            |     |
|-----|-----------------|----------------------------------------|---------------------------------------------------------------------------------------|-------------------------------|------------|-----|
|     |                 |                                        |                                                                                       | <i>Helicobacter pylori</i>    | 3.84\30.87 |     |
| 135 | Cowagarcinone E | <i>Garcinia cowa</i>                   | 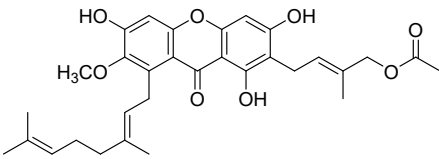   | <i>MRSA</i>                   | 8          | 1-2 |
|     |                 |                                        |                                                                                       | <i>Staphylococcus aureus</i>  | >128       |     |
|     |                 |                                        |                                                                                       | <i>Escherichia coli</i>       | 128        |     |
|     |                 |                                        |                                                                                       | <i>Salmonella typhimurium</i> | 128        |     |
| 136 | Cochinchinone A | the root of <i>Cratoxylum formosum</i> |    | <i>Bacillus subtilis</i>      | 150        | 29  |
|     |                 |                                        |                                                                                       | <i>Staphylococcus aureus</i>  | 150        |     |
|     |                 |                                        |                                                                                       | <i>Enterococcus faecalis</i>  | 150        |     |
|     |                 |                                        |                                                                                       | <i>MRSA</i>                   | 9.37       |     |
|     |                 |                                        |                                                                                       | <i>VRE</i>                    | 150        |     |
|     |                 |                                        |                                                                                       | <i>Salmonella typhi</i>       | >150       |     |
|     |                 |                                        |                                                                                       | <i>Shigella sonnei</i>        | >150       |     |
|     |                 |                                        |                                                                                       | <i>Pseudomonas aeruginosa</i> | 4.7        |     |
| 137 | Pruniflorone L  | the root of <i>Cratoxylum formosum</i> |  | <i>Bacillus subtilis</i>      | >300       | 29  |
|     |                 |                                        |                                                                                       | <i>Staphylococcus aureus</i>  | >300       |     |
|     |                 |                                        |                                                                                       | <i>Enterococcus faecalis</i>  | >300       |     |
|     |                 |                                        |                                                                                       | <i>MRSA</i>                   | >300       |     |
|     |                 |                                        |                                                                                       | <i>VRE</i>                    | >300       |     |
|     |                 |                                        |                                                                                       | <i>Salmonella typhi</i>       | >300       |     |

|     |                                                                                       |                                                                        |                                                                                       |                               |             |       |
|-----|---------------------------------------------------------------------------------------|------------------------------------------------------------------------|---------------------------------------------------------------------------------------|-------------------------------|-------------|-------|
|     |                                                                                       |                                                                        |                                                                                       | <i>Shigella sonnei</i>        | >300        |       |
|     |                                                                                       |                                                                        |                                                                                       | <i>Pseudomonas aeruginosa</i> | >300        |       |
| 138 | 1,3,5,8-tetrahydroxy-2-(3-methylbut-2-enyl)-4-(3,7-dimethyl-octa-2,6-dienyl)-xanthone | <i>Garcinia smeathmannii</i>                                           | 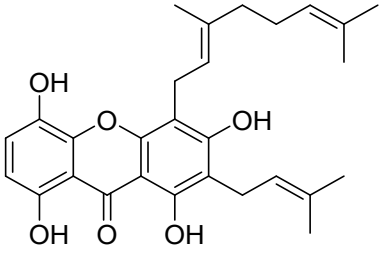   | <i>Staphylococcus aureus</i>  | 64          | 53    |
|     |                                                                                       |                                                                        |                                                                                       | <i>Enterococcus faecalis</i>  | 8           |       |
|     |                                                                                       |                                                                        |                                                                                       | <i>Bacillus cereus</i>        | 256         |       |
|     |                                                                                       |                                                                        |                                                                                       | <i>Pseudomonas aeruginosa</i> | 16          |       |
|     |                                                                                       |                                                                        |                                                                                       | <i>Escherichia coli</i>       | 32          |       |
|     |                                                                                       |                                                                        |                                                                                       | <i>Salmonella typhimurium</i> | 64          |       |
| 139 | 7-O-methyl-garcinone E                                                                | the fruits and flowers of <i>Garcinia cowa</i>                         |   | <i>Bacillus cereus</i>        | 32          | 13,47 |
|     |                                                                                       |                                                                        |                                                                                       | <i>Bacillus subtilis</i>      | 32          |       |
|     |                                                                                       |                                                                        |                                                                                       | <i>Staphylococcus aureus</i>  | >128        |       |
|     |                                                                                       |                                                                        |                                                                                       | <i>Escherichia coli</i>       | >128        |       |
|     |                                                                                       |                                                                        |                                                                                       | <i>Salmonella typhimurium</i> | 128         |       |
|     |                                                                                       |                                                                        |                                                                                       | <i>Pseudomonas aeruginosa</i> | 128         |       |
|     |                                                                                       |                                                                        |                                                                                       | MRSA                          | 64          |       |
| 140 | Garcinone E                                                                           | the bark of <i>Garcinia mangostana</i> ;<br><i>Garcinia mangostana</i> |  | MRSA                          | 3.9\25\62.4 | 38,54 |
|     |                                                                                       |                                                                        |                                                                                       | <i>Staphylococcus</i>         | 25\12.5     |       |

|     |                                                                        |                                                |                                                                                       |                               |            |    |
|-----|------------------------------------------------------------------------|------------------------------------------------|---------------------------------------------------------------------------------------|-------------------------------|------------|----|
|     |                                                                        |                                                |                                                                                       | <i>aureus</i>                 |            |    |
|     |                                                                        |                                                |                                                                                       | <i>Escherichia coli</i>       | 25         |    |
|     |                                                                        |                                                |                                                                                       | <i>Vibrio vulnificus</i>      | 15.6       |    |
|     |                                                                        |                                                |                                                                                       | <i>Vibrio rotiferianus</i>    | 15.6       |    |
|     |                                                                        |                                                |                                                                                       | <i>Vibrio campbellii</i>      | 31.2       |    |
| 141 | 4-prenyl-2-(3,7-dimethyl-2.6-octadienyl)-1,3,5,8-tetrahydroxy-xanthone |                                                | 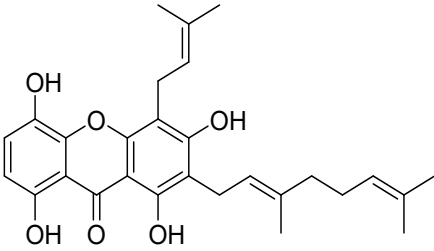   | <i>Escherichia coli</i>       | 64\128     | 21 |
|     |                                                                        |                                                |                                                                                       | <i>Enterobacter aerogenes</i> | 128\256\64 |    |
|     |                                                                        |                                                |                                                                                       | <i>Klebsiella pneumoniae</i>  | 512        |    |
|     |                                                                        |                                                |                                                                                       | <i>Providencia stuartii</i>   | 64\256     |    |
|     |                                                                        |                                                |                                                                                       | <i>Pseudomonas aeruginosa</i> | 64\128     |    |
| 142 | Formoxanthone A                                                        | the roots of <i>Cratoxylum formosum</i>        |   | <i>Pseudomonas aeruginosa</i> | >50        | 32 |
|     |                                                                        |                                                |                                                                                       | <i>Bacillus subtilis</i>      | 18.7       |    |
|     |                                                                        |                                                |                                                                                       | <i>Staphylococcus aureus</i>  | 37.5       |    |
|     |                                                                        |                                                |                                                                                       | <i>Streptococcus faecalis</i> | >50        |    |
|     |                                                                        |                                                |                                                                                       | <i>Salmonella typhi</i>       | >50        |    |
| 143 | Garcinianone B                                                         | the fruits and flowers of <i>Garcinia cowa</i> |  | <i>Bacillus cereus</i>        | 2          | 47 |
|     |                                                                        |                                                |                                                                                       | <i>Bacillus subtilis</i>      | 2          |    |
|     |                                                                        |                                                |                                                                                       | <i>Staphylococcus aureus</i>  | 64         |    |

|     |                       |                                                |                                                                                       |                                                                                                                                                                                                                                                                        |    |
|-----|-----------------------|------------------------------------------------|---------------------------------------------------------------------------------------|------------------------------------------------------------------------------------------------------------------------------------------------------------------------------------------------------------------------------------------------------------------------|----|
|     |                       |                                                |                                                                                       | <i>Escherichia coli</i><br>64<br><i>Salmonella typhimurium</i><br>64<br><i>Pseudomonas aeruginosa</i><br>128                                                                                                                                                           |    |
| 144 | Garcinianone A        | the fruits and flowers of <i>Garcinia cowa</i> | 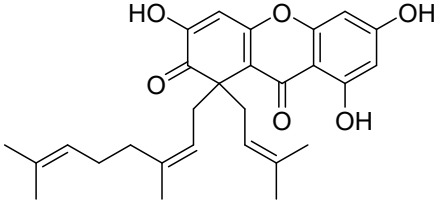   | <i>Bacillus cereus</i><br>4<br><i>Bacillus subtilis</i><br>2<br><i>Staphylococcus aureus</i><br>64<br><i>Escherichia coli</i><br>64<br><i>Salmonella typhimurium</i><br>64<br><i>Pseudomonas aeruginosa</i><br>128<br><i>Staphylococcus aureus</i><br>16<br>MRSA<br>26 | 47 |
| 145 | mangostanaxanthone II | <i>Garcinia mangostana</i>                     |  | <i>Escherichia coli</i><br>794<br><i>Bacillus cereus</i><br>1000<br><i>Staphylococcus aureus</i><br>1000                                                                                                                                                               | 3  |

|     |                                                                                                          |                                                                     |                                                                                      |                               |         |            |
|-----|----------------------------------------------------------------------------------------------------------|---------------------------------------------------------------------|--------------------------------------------------------------------------------------|-------------------------------|---------|------------|
| 146 | Garciniacowone                                                                                           | <i>Garcinia cowa</i>                                                | 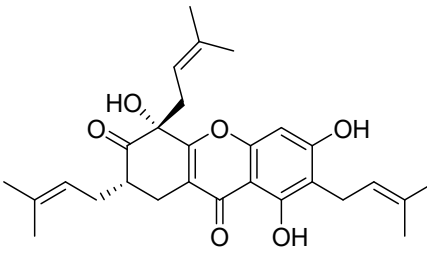  | MRSA                          | 2       | 1          |
|     |                                                                                                          |                                                                     |                                                                                      | <i>Staphylococcus aureus</i>  | 2       |            |
|     |                                                                                                          |                                                                     |                                                                                      | <i>Escherichia coli</i>       | 128     |            |
|     |                                                                                                          |                                                                     |                                                                                      | <i>Salmonella typhimurium</i> | 128     |            |
| 147 | 2-(3,7-Dimethyl-2,6-octadien-1-yl)-1,3,6-trihydroxy-7-methoxy-8-(3-methyl-2-buten-1-yl)-9H-xanthen-9-one | <i>Cratoxylum cochinchinense</i>                                    |   | MRSA                          | >128    | 2          |
|     |                                                                                                          |                                                                     |                                                                                      | <i>Staphylococcus aureus</i>  | >128    |            |
|     |                                                                                                          |                                                                     |                                                                                      | <i>Escherichia coli</i>       | >128\64 |            |
|     |                                                                                                          |                                                                     |                                                                                      | <i>Salmonella typhimurium</i> | 128     |            |
|     |                                                                                                          |                                                                     |                                                                                      | <i>Bacillus cereus</i>        | >128    |            |
|     |                                                                                                          |                                                                     |                                                                                      | <i>Bacillus subtilis</i>      | 128     |            |
|     |                                                                                                          |                                                                     |                                                                                      | <i>Pseudomonas aeruginosa</i> | 128     |            |
| 148 | Fuscaxanthone A                                                                                          | the fruits and flowers <i>Garcinia cowa</i> ; <i>Garcinia fusca</i> |  | MRSA                          | >128\8  | 1-2, 46-47 |
|     |                                                                                                          |                                                                     |                                                                                      | <i>Staphylococcus aureus</i>  | >128    |            |
|     |                                                                                                          |                                                                     |                                                                                      | <i>Micrococcus luteus</i>     | 64      |            |
|     |                                                                                                          |                                                                     |                                                                                      | <i>Escherichia coli</i>       | >128\64 |            |
|     |                                                                                                          |                                                                     |                                                                                      | <i>Salmonella typhimurium</i> | 64      |            |
|     |                                                                                                          |                                                                     |                                                                                      | <i>Staphylococcus</i>         | 64      |            |



|     |                 |                                                |                                                                                       |                               |                 |    |
|-----|-----------------|------------------------------------------------|---------------------------------------------------------------------------------------|-------------------------------|-----------------|----|
|     |                 |                                                |                                                                                       | <i>epidermidis</i>            |                 |    |
|     |                 |                                                |                                                                                       | <i>Helicobacter pylori</i>    | 3.70\7.76\29.76 |    |
|     |                 |                                                |                                                                                       | <i>Bacillus cereus</i>        | 64              |    |
|     |                 |                                                |                                                                                       | <i>Bacillus subtilis</i>      | 64              |    |
|     |                 |                                                |                                                                                       | <i>Pseudomonas aeruginosa</i> | 128             |    |
| 149 | Allanxanthone B | the stem bark of <i>Allanblackia monticola</i> | 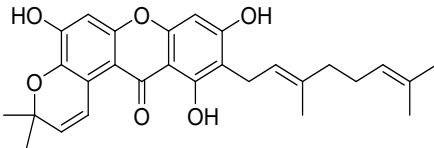   | <i>Staphylococcus aureus</i>  | \               | 12 |
|     |                 |                                                |                                                                                       | <i>Vibrio anguillarum</i>     | \               |    |
|     |                 |                                                |                                                                                       | <i>Candida tropicalis</i>     | \               |    |
| 150 | Cowaxanthone C  | the fruits of <i>Garcinia cowa</i>             |   | <i>Staphylococcus aureus</i>  | 128             | 13 |
|     |                 |                                                |                                                                                       | MRSA                          | 128             |    |
| 151 | Pruniflorone K  | the root of <i>Cratoxylum formosum</i>         |  | <i>Bacillus subtilis</i>      | 300             | 29 |
|     |                 |                                                |                                                                                       | <i>Staphylococcus aureus</i>  | >300            |    |
|     |                 |                                                |                                                                                       | <i>Enterococcus faecalis</i>  | >300            |    |
|     |                 |                                                |                                                                                       | MRSA                          | >300            |    |
|     |                 |                                                |                                                                                       | VRE                           | >300            |    |

|     |                    |                                                |                                                                                       |                               |               |    |
|-----|--------------------|------------------------------------------------|---------------------------------------------------------------------------------------|-------------------------------|---------------|----|
|     |                    |                                                |                                                                                       | <i>Salmonella typhi</i>       | >300          |    |
|     |                    |                                                |                                                                                       | <i>Shigella sonnei</i>        | >300          |    |
|     |                    |                                                |                                                                                       | <i>Pseudomonas aeruginosa</i> | >300          |    |
| 152 | Tovophyllin A      | the stem bark of <i>Allanblackia monticola</i> | 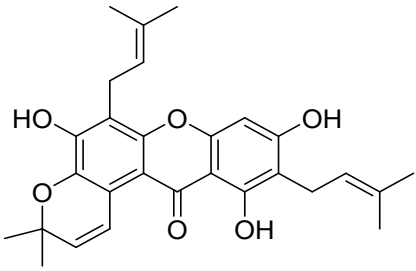   | <i>Staphylococcus aureus</i>  | \             | 12 |
|     |                    |                                                |                                                                                       | <i>Vibrio anguillarum</i>     | \             |    |
|     |                    |                                                |                                                                                       | <i>Candida tropicalis</i>     | \             |    |
| 153 | Batukinaxanthone   | <i>Calophyllum</i>                             |   | <i>Staphylococcus aureus</i>  | \             | 16 |
| 154 | Fuscaxanthone I    | <i>Garcinia fusca</i>                          |  | <i>Helicobacter pylori</i>    | 7.99\3.99\320 | 46 |
| 155 | Cratosumatranone C | the roots of <i>Cratoxylum sumatranum</i>      |  | <i>Micrococcus luteus</i>     | >128          | 51 |
|     |                    |                                                |                                                                                       | <i>Bacillus cereus</i>        | >128          |    |

|     |                  |                                                |                                                                                       |                                                                                                                                                                                                                       |    |
|-----|------------------|------------------------------------------------|---------------------------------------------------------------------------------------|-----------------------------------------------------------------------------------------------------------------------------------------------------------------------------------------------------------------------|----|
|     |                  |                                                |                                                                                       | <i>Bacillus subtilis</i> \<br><i>Staphylococcus aureus</i> >128<br><i>Staphylococcus epidermidis</i> >128<br><i>Escherichia coli</i> >128<br><i>Salmonella typhimurium</i> >128<br><i>Pseudomonas aeruginosa</i> >128 |    |
| 156 | Fuscaxanthone G  | <i>Garcinia fusca</i>                          | 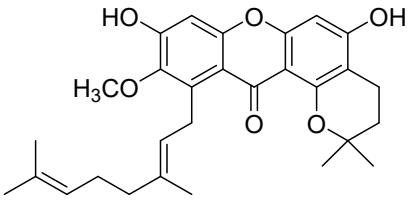   | <i>Helicobacter pylori</i> 7.46\3.72\29.87                                                                                                                                                                            | 46 |
| 157 | Formoxanthone B  | the roots of <i>Cratoxylum formosum</i>        |   | <i>Pseudomonas aeruginosa</i> >50<br><i>Bacillus subtilis</i> 4.6<br><i>Staphylococcus aureus</i> 2.3<br><i>Streptococcus faecalis</i> 18.7<br><i>Salmonella typhi</i> 4.6                                            | 32 |
| 158 | Garciniacowone D | the fruits and flowers of <i>Garcinia cowa</i> |  | <i>Bacillus cereus</i> 64<br><i>Bacillus subtilis</i> 128<br><i>Staphylococcus</i> >128                                                                                                                               | 47 |

|                   |                  |                                                |                                                                                       |                               |      |    |
|-------------------|------------------|------------------------------------------------|---------------------------------------------------------------------------------------|-------------------------------|------|----|
|                   |                  |                                                |                                                                                       | <i>aureus</i>                 |      |    |
|                   |                  |                                                |                                                                                       | <i>Escherichia coli</i>       | >128 |    |
|                   |                  |                                                |                                                                                       | <i>Salmonella typhimurium</i> | 64   |    |
|                   |                  |                                                |                                                                                       | <i>Pseudomonas aeruginosa</i> | 128  |    |
| 159               | Garcicowanone B  | <i>Garcinia cowa</i>                           | 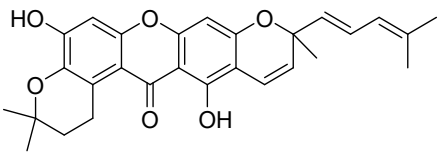   | <i>Bacillus cereus</i>        | >128 | 2  |
| Tetraprenyl group |                  |                                                |                                                                                       |                               |      |    |
| 160               | Garciniacowone A | the fruits and flowers of <i>Garcinia cowa</i> |   | <i>Bacillus cereus</i>        | 8    | 47 |
|                   |                  |                                                |                                                                                       | <i>Bacillus subtilis</i>      | 8    |    |
|                   |                  |                                                |                                                                                       | <i>Staphylococcus aureus</i>  | >128 |    |
|                   |                  |                                                |                                                                                       | <i>Escherichia coli</i>       | >128 |    |
|                   |                  |                                                |                                                                                       | <i>Salmonella typhimurium</i> | 64   |    |
|                   |                  |                                                |                                                                                       | <i>Pseudomonas aeruginosa</i> | 128  |    |
| 161               | Garciniacowone B | the fruits and flowers of <i>Garcinia cowa</i> |  | <i>Bacillus cereus</i>        | 8    | 47 |
|                   |                  |                                                |                                                                                       | <i>Bacillus subtilis</i>      | 8    |    |
|                   |                  |                                                |                                                                                       | <i>Staphylococcus aureus</i>  | 64   |    |

|        |                                                                       |                                            |                                                                                       |                                           |       |    |
|--------|-----------------------------------------------------------------------|--------------------------------------------|---------------------------------------------------------------------------------------|-------------------------------------------|-------|----|
|        |                                                                       |                                            |                                                                                       | <i>Escherichia coli</i>                   | 64    |    |
|        |                                                                       |                                            |                                                                                       | <i>Salmonella typhimurium</i>             | 64    |    |
|        |                                                                       |                                            |                                                                                       | <i>Pseudomonas aeruginosa</i>             | 129   |    |
| Others |                                                                       |                                            |                                                                                       |                                           |       |    |
| 162    | Chloroisosulochrin dehydrate                                          |                                            | 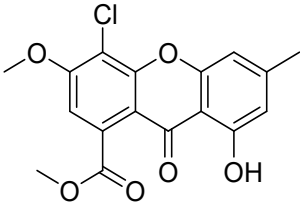   | MRSA                                      | 50    | 41 |
|        |                                                                       |                                            |                                                                                       | <i>Staphylococcus aureus</i> ATCC 25923   | 50    |    |
|        |                                                                       |                                            |                                                                                       | <i>Escherichia coli</i> ATCC 25922        | 50    |    |
|        |                                                                       |                                            |                                                                                       | <i>Bacillus cereus</i> ATCC 11778         | 50    |    |
|        |                                                                       |                                            |                                                                                       | <i>Vibrio alginolyticus</i> ATCC 17749    | 50    |    |
|        |                                                                       |                                            |                                                                                       | <i>Vibrio parahaemolyticus</i> ATCC 17802 | 50    |    |
| 163    | 4-chloro-1-hydroxy-3-methoxy-6-methyl-8-methoxycarbonyl-xanthen-9-one | fungus <i>Penicillium citrinum</i> HL-5126 |  | MRSA                                      | >17.4 | 41 |
|        |                                                                       |                                            |                                                                                       | <i>Staphylococcus aureus</i>              | >17.4 |    |
|        |                                                                       |                                            |                                                                                       | <i>Escherichia coli</i>                   | >17.4 |    |
|        |                                                                       |                                            |                                                                                       | <i>Bacillus cereus</i>                    | >17.4 |    |
|        |                                                                       |                                            |                                                                                       | <i>Vibrio alginolyticus</i>               | >17.4 |    |

|     |                                  |                                            |                                                                                       |                                   |       |    |
|-----|----------------------------------|--------------------------------------------|---------------------------------------------------------------------------------------|-----------------------------------|-------|----|
|     |                                  |                                            |                                                                                       | <i>Vibrio parahaemolyticus</i>    | >17.4 |    |
| 164 | 2'-acetoxy-7-chloro-citreorosein | fungus <i>Penicillium citrinum</i> HL-5126 | 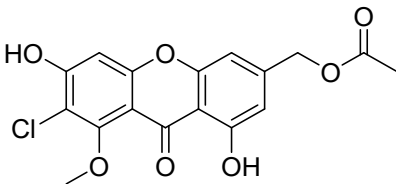   | MRSA                              | >18.2 | 41 |
|     |                                  |                                            |                                                                                       | <i>Staphylococcus aureus</i>      | 8.30  |    |
|     |                                  |                                            |                                                                                       | <i>Escherichia coli</i>           | >18.2 |    |
|     |                                  |                                            |                                                                                       | <i>Bacillus cereus</i>            | >18.2 |    |
|     |                                  |                                            |                                                                                       | <i>Vibrio alginolyticus</i>       | >18.2 |    |
|     |                                  |                                            |                                                                                       | <i>Vibrio parahaemolyticus</i>    | 3.64  |    |
| 165 | Neriifolone B                    | the roots of <i>Cratoxylum sumatranum</i>  |    | <i>Micrococcus luteus</i>         | >128  | 51 |
|     |                                  |                                            |                                                                                       | <i>Bacillus cereus</i>            | >128  |    |
|     |                                  |                                            |                                                                                       | <i>Bacillus subtilis</i>          | \     |    |
|     |                                  |                                            |                                                                                       | <i>Staphylococcus aureus</i>      | >128  |    |
|     |                                  |                                            |                                                                                       | <i>Staphylococcus epidermidis</i> | >128  |    |
|     |                                  |                                            |                                                                                       | <i>Escherichia coli</i>           | >128  |    |
|     |                                  |                                            |                                                                                       | <i>Salmonella typhimurium</i>     | >128  |    |
|     |                                  |                                            |                                                                                       | <i>Pseudomonas aeruginosa</i>     | >128  |    |
| 166 | 14-Hydroxyltjixanthone hydrate   | the fungus <i>Emericella</i> sp. XL029     |  | <i>Micrococcus luteus</i>         | 25    | 62 |
|     |                                  |                                            |                                                                                       | <i>Staphylococcus aureus</i>      | 25    |    |

|     |                                                      |                         |                                                                                     |                                                                                                                                                                                                                                                                                                                                                                                     |  |
|-----|------------------------------------------------------|-------------------------|-------------------------------------------------------------------------------------|-------------------------------------------------------------------------------------------------------------------------------------------------------------------------------------------------------------------------------------------------------------------------------------------------------------------------------------------------------------------------------------|--|
|     |                                                      |                         |                                                                                     | <i>Bacillus megaterium</i> 25<br><i>Bacillus anthracis</i> 25<br><i>Bacillus paratyphosum</i> 25<br>MRSA >100<br><i>Pseudomonas aeruginosa</i> 50<br><i>Bacillus cereus</i> 50<br><i>Enterobacter aerogenes</i> 50                                                                                                                                                                  |  |
| 167 | <i>O</i> -demethyl-3',4'-deoxysorospermin-3',4'-diol | <i>Vismia laurentii</i> | 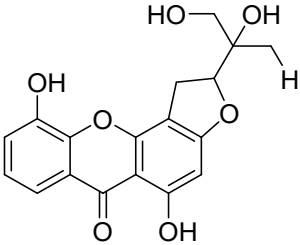 | <i>Citrobacter freundii</i> \ 32<br><i>Enterobacter aerogens</i> \<br><i>Enterobacter cloacae</i> 19.53<br><i>Escherichia coli</i> \<br><i>Klebsiella pneumoniae</i> 78.12<br><i>Morganella morganii</i> 39.06<br><i>Proteus mirabilis</i> 19.53<br><i>proteus vulgaris</i> \<br><i>Pseudomonas aeruginosa</i> \<br><i>Shigella dysenteriae</i> \<br><i>Shigella flexneri</i> 39.06 |  |

|     |                   |                              |                                                                                       |                                    |         |    |
|-----|-------------------|------------------------------|---------------------------------------------------------------------------------------|------------------------------------|---------|----|
|     |                   |                              |                                                                                       | <i>Salmonella typhi</i>            | \       |    |
|     |                   |                              |                                                                                       | <i>Streptococcus faecalis</i>      | 78.12   |    |
|     |                   |                              |                                                                                       | <i>Staphylococcus aureus</i>       | 19.53   |    |
|     |                   |                              |                                                                                       | <i>Bacillus cereus</i>             | \       |    |
|     |                   |                              |                                                                                       | <i>Bacillus megaterium</i>         | \       |    |
|     |                   |                              |                                                                                       | <i>Bacillus stearothermophilus</i> | \       |    |
|     |                   |                              |                                                                                       | <i>Bacillus subtilis</i>           | 1.22    |    |
| 168 | Kielcorin         | <i>Kielmeyera variabilis</i> | 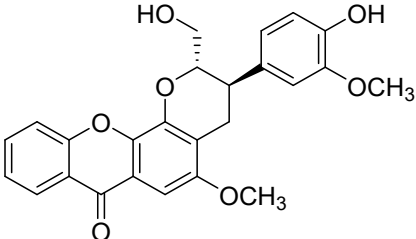   | MRSA                               | >512    | 40 |
| 169 | Calozeyloxanthone | Calophyllum                  |   | <i>Staphylococcus aureus</i>       | 4.1-8.3 | 16 |
|     |                   |                              |                                                                                       | VRE                                | 6.25    |    |
|     |                   |                              |                                                                                       | VSE                                | 12.5    |    |
| 170 | Fusarioxazin      | <i>Fusarium oxysporum</i>    |  | <i>Staphylococcus aureus</i>       | 5.3     | 22 |
|     |                   |                              |                                                                                       | <i>Bacillus cereus</i>             | 3.7     |    |



|     |                        |                                            |                                                                                      |                         |         |       |
|-----|------------------------|--------------------------------------------|--------------------------------------------------------------------------------------|-------------------------|---------|-------|
| 171 | Scortechinone U        | the fruits of <i>Garcinia scortechinii</i> | 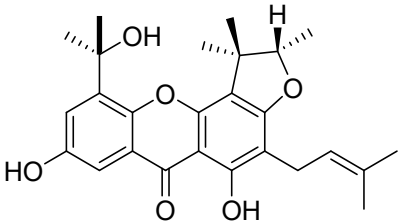  | MRSA                    | >127.95 | 34-35 |
| 172 | Scortechinone V        | the fruits of <i>Garcinia scortechinii</i> |   | MRSA                    | 35.20   | 34-35 |
| 173 | Isosecostrigmatocystin | fungus <i>Aspergillus nidulans</i>         |  | <i>Escherichia coli</i> | \       | 36    |
|     |                        |                                            | <i>Micrococcus luteus</i>                                                            | \                       |         |       |
|     |                        |                                            | <i>Vibrio vulnificus</i>                                                             | \                       |         |       |
|     |                        |                                            | <i>Vibrio anguillarum</i>                                                            | \                       |         |       |
|     |                        |                                            | <i>Vibrio alginolyticus</i>                                                          | \                       |         |       |
|     |                        |                                            | <i>Ed ictalurid</i>                                                                  | 16                      |         |       |
|     |                        |                                            | <i>Vibrio parahaemolyticus</i>                                                       | \                       |         |       |

|                 |                 |                                               |                                                                                      |                                                              |            |    |
|-----------------|-----------------|-----------------------------------------------|--------------------------------------------------------------------------------------|--------------------------------------------------------------|------------|----|
| 174             | Scortechinone W | <i>Garcinia scortechinii</i>                  | 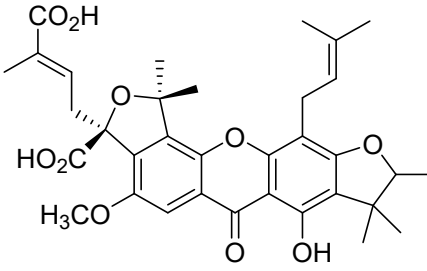  | MRSA                                                         | 34.86      | 34 |
| 175             | Scortechinone X | <i>Garcinia scortechinii</i>                  |   | MRSA                                                         | >127.73    | 34 |
| Caged xanthenes |                 |                                               |                                                                                      |                                                              |            |    |
| 176             | Scortechinone L | the stem bark of <i>Garcinia scortechinii</i> |  | <i>Staphylococcus aureus</i><br><i>Staphylococcus aureus</i> | >64<br>>64 | 49 |

|     |                 |                                               |  |                              |       |    |
|-----|-----------------|-----------------------------------------------|--|------------------------------|-------|----|
| 177 | Scortechinone F | the stem bark of <i>Garcinia scortechinii</i> |  | <i>Staphylococcus aureus</i> | 16\4  | 49 |
| 178 | Scortechinone E | the stem bark of <i>Garcinia scortechinii</i> |  | <i>Staphylococcus aureus</i> | >256  | 49 |
| 179 | Scortechinone H | the stem bark of <i>Garcinia scortechinii</i> |  | <i>Staphylococcus aureus</i> | >64\4 | 49 |

|     |                 |                                               |                                                                                                                                                                                                                                                                                                                                                                                                                  |                              |     |       |
|-----|-----------------|-----------------------------------------------|------------------------------------------------------------------------------------------------------------------------------------------------------------------------------------------------------------------------------------------------------------------------------------------------------------------------------------------------------------------------------------------------------------------|------------------------------|-----|-------|
| 180 | Scortechinone G | the stem bark of <i>Garcinia scortechinii</i> | 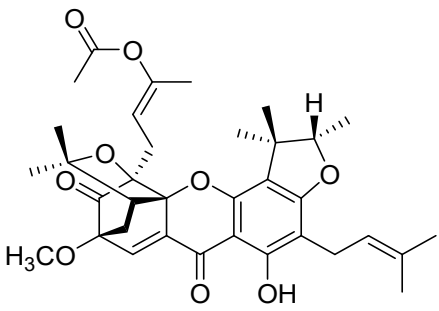 <p>The chemical structure of Scortechinone G is a complex polycyclic molecule. It features a central chromone-like core with a fused bicyclic system on the left and a furan ring on the right. Substituents include a methoxy group (H<sub>3</sub>CO), a methyl ester group, a hydroxyl group (OH), and a prenyl chain.</p> | <i>Staphylococcus aureus</i> | >64 | 49    |
| 181 | Scortechinone C | the stem bark of <i>Garcinia scortechinii</i> |  <p>The chemical structure of Scortechinone C is similar to Scortechinone G but features a carboxylic acid group (CO<sub>2</sub>H) instead of a methyl ester group. It also has a methoxy group (H<sub>3</sub>CO), a hydroxyl group (OH), and a prenyl chain.</p>                                                             | <i>Staphylococcus aureus</i> | 32  | 49    |
| 182 | Scortechinone S | the fruits of <i>Garcinia scortechinii</i>    |  <p>The chemical structure of Scortechinone S is similar to Scortechinone C but includes an additional methoxy group (OCH<sub>3</sub>) on the central ring system. It also has a carboxylic acid group (CO<sub>2</sub>H), a hydroxyl group (OH), and a prenyl chain.</p>                                                     | MRSA                         | 64  | 34-35 |

|     |                 |                                               |                                                                                                                                                                                                                                                                                                                                                                                                                                                                                                                                                                                                                                                                                                                                                    |                              |        |       |
|-----|-----------------|-----------------------------------------------|----------------------------------------------------------------------------------------------------------------------------------------------------------------------------------------------------------------------------------------------------------------------------------------------------------------------------------------------------------------------------------------------------------------------------------------------------------------------------------------------------------------------------------------------------------------------------------------------------------------------------------------------------------------------------------------------------------------------------------------------------|------------------------------|--------|-------|
| 183 | Scortechinone T | the fruits of <i>Garcinia scortechinii</i>    | 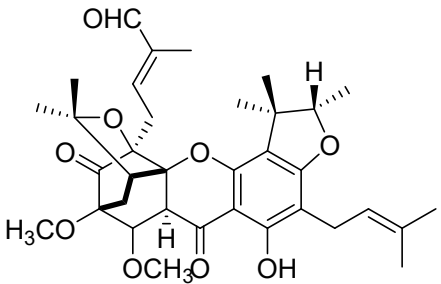 <p>The chemical structure of Scortechinone T is a complex polycyclic molecule. It features a central benzene ring fused to a five-membered ring containing a ketone group and a methoxy group (H<sub>3</sub>CO). This is further fused to a six-membered ring with a hydroxyl group (OH) and a methoxy group (OCH<sub>3</sub>). A side chain with a terminal hydroxyl group (OHC) and a methyl group is attached to the six-membered ring. Another side chain with a terminal hydroxyl group (OH) and a methyl group is attached to the benzene ring. The structure is highly substituted with various stereocenters indicated by wedged and dashed bonds.</p> | MRSA                         | >63.87 | 34-35 |
| 184 | Scortechinone O | the stem bark of <i>Garcinia scortechinii</i> |  <p>The chemical structure of Scortechinone O is similar to Scortechinone T but with a carboxylic acid group (CO<sub>2</sub>H) instead of a hydroxyl group at the top position of the side chain. It also features a side chain with a terminal hydroxyl group (OH) and a methyl group, and a methoxy group (H<sub>3</sub>CO) on the six-membered ring. The structure is highly substituted with various stereocenters indicated by wedged and dashed bonds.</p>                                                                                                                                                                                                | <i>Staphylococcus aureus</i> | >128   | 49    |
| 185 | Scortechinone P | the stem bark of <i>Garcinia scortechinii</i> |  <p>The chemical structure of Scortechinone P is similar to Scortechinone T but with a hydroxyl group (OH) instead of a methoxy group at the bottom position of the six-membered ring. It also features a side chain with a terminal hydroxyl group (OH) and a methyl group, and a methoxy group (H<sub>3</sub>CO) on the six-membered ring. The structure is highly substituted with various stereocenters indicated by wedged and dashed bonds.</p>                                                                                                                                                                                                          | <i>Staphylococcus aureus</i> | 32\16  | 49    |

|     |                 |                                                          |                                                                                                                                                                                                                                                                                                                                                                                                                                                                                                                                                                                                                                                                                                                           |                              |       |              |
|-----|-----------------|----------------------------------------------------------|---------------------------------------------------------------------------------------------------------------------------------------------------------------------------------------------------------------------------------------------------------------------------------------------------------------------------------------------------------------------------------------------------------------------------------------------------------------------------------------------------------------------------------------------------------------------------------------------------------------------------------------------------------------------------------------------------------------------------|------------------------------|-------|--------------|
| 186 | Scortechinone I | the stem bark and fruits of <i>Garcinia scortechinii</i> | 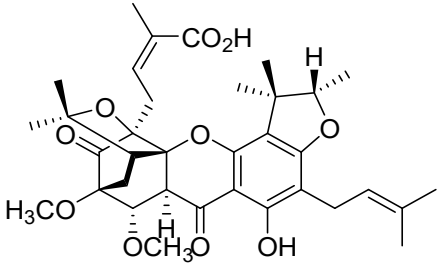 <p>The chemical structure of Scortechinone I is a complex polycyclic molecule. It features a central benzene ring fused to a five-membered ring containing a ketone group and a methoxy group (H<sub>3</sub>CO). This is further fused to a six-membered ring with a hydroxyl group (OH) and a methoxy group (OCH<sub>3</sub>). A side chain with a terminal carboxylic acid group (CO<sub>2</sub>H) and a methyl group is attached to the six-membered ring. Another side chain with a terminal methyl group and a double bond is attached to the five-membered ring. Stereochemistry is indicated with wedged and dashed bonds.</p> | MRSA                         | 7.99  | 34-35,<br>49 |
| 187 | Scortechinone D | the stem bark of <i>Garcinia scortechinii</i>            |  <p>The chemical structure of Scortechinone D is similar to Scortechinone I but lacks the carboxylic acid group. It features a central benzene ring fused to a five-membered ring containing a ketone group and a methoxy group (H<sub>3</sub>CO). This is further fused to a six-membered ring with a hydroxyl group (OH). A side chain with a terminal methyl group and a double bond is attached to the five-membered ring. Stereochemistry is indicated with wedged and dashed bonds.</p>                                                                                                                                          | <i>Staphylococcus aureus</i> | >256  | 49           |
| 188 | Scortechinone A | the stem bark of <i>Garcinia scortechinii</i>            |  <p>The chemical structure of Scortechinone A is identical to Scortechinone I. It features a central benzene ring fused to a five-membered ring containing a ketone group and a methoxy group (H<sub>3</sub>CO). This is further fused to a six-membered ring with a hydroxyl group (OH) and a methoxy group (OCH<sub>3</sub>). A side chain with a terminal carboxylic acid group (CO<sub>2</sub>H) and a methyl group is attached to the six-membered ring. Another side chain with a terminal methyl group and a double bond is attached to the five-membered ring. Stereochemistry is indicated with wedged and dashed bonds.</p> | MRSA                         | 128.2 | 49           |

|     |                 |                                            |                                                                                      |                                                                                                                    |                      |       |
|-----|-----------------|--------------------------------------------|--------------------------------------------------------------------------------------|--------------------------------------------------------------------------------------------------------------------|----------------------|-------|
| 189 | Scortechinone Q | the fruits of <i>Garcinia scortechinii</i> | 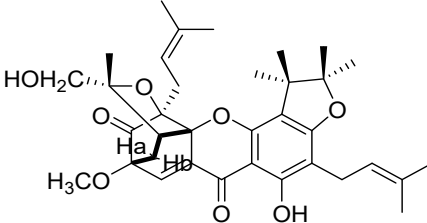  | MRSA                                                                                                               | >130.45              | 34-35 |
| 190 | Scortechinone R | the fruits of <i>Garcinia scortechinii</i> |   | MRSA                                                                                                               | >127.7               | 34-35 |
| 191 | Bractatin       | the roots of <i>Garcinia propinqua</i>     |  | <i>Bacillus cereus</i><br><i>Bacillus subtilis</i><br><i>Escherichia coli</i><br><i>Staphylococcus typhimurium</i> | 8<br>1<br>128<br>128 | 43    |

|     |                 |                                               |                                                                                                                                                                                                                                                                                                                                                                                                                                                                                                                                                                                                                                                                                                                     |                              |        |    |
|-----|-----------------|-----------------------------------------------|---------------------------------------------------------------------------------------------------------------------------------------------------------------------------------------------------------------------------------------------------------------------------------------------------------------------------------------------------------------------------------------------------------------------------------------------------------------------------------------------------------------------------------------------------------------------------------------------------------------------------------------------------------------------------------------------------------------------|------------------------------|--------|----|
| 192 | Scortechinone J | the stem bark of <i>Garcinia scortechinii</i> | 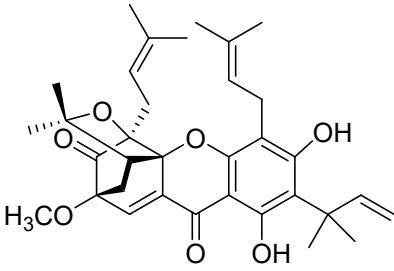 <p>The chemical structure of Scortechinone J is a complex polycyclic molecule. It features a central benzene ring with two hydroxyl groups (OH) and a methoxy group (H<sub>3</sub>CO). This central ring is fused to a six-membered ring containing a carbonyl group (C=O) and a methoxy group (H<sub>3</sub>CO). The structure also includes a five-membered ring with a carbonyl group (C=O) and a methoxy group (H<sub>3</sub>CO). Various side chains are attached, including a prenyl chain, a propenyl chain, and a dimethylallyl chain.</p>                                                                              | <i>Staphylococcus aureus</i> | 32\8   | 49 |
| 193 | Hanburinone     | the fruits of <i>Garcinia hanburyi</i>        |  <p>The chemical structure of Hanburinone is a complex polycyclic molecule. It features a central benzene ring with two hydroxyl groups (OH) and a methoxy group (OCH<sub>3</sub>). This central ring is fused to a six-membered ring containing a carbonyl group (C=O) and a methoxy group (OCH<sub>3</sub>). The structure also includes a five-membered ring with a carbonyl group (C=O) and a methoxy group (OCH<sub>3</sub>). Various side chains are attached, including a propenyl chain with a carboxylic acid group (CO<sub>2</sub>H), a dimethylallyl chain, and a dimethylallyl chain with a hydroxyl group (OH).</p> | MRSA                         | 124.85 | 52 |
| 194 | Isomoreollin B  | the fruits of <i>Garcinia hanburyi</i>        |  <p>The chemical structure of Isomoreollin B is a complex polycyclic molecule. It features a central benzene ring with two hydroxyl groups (OH) and a methoxy group (OCH<sub>3</sub>). This central ring is fused to a six-membered ring containing a carbonyl group (C=O) and a methoxy group (OCH<sub>3</sub>). The structure also includes a five-membered ring with a carbonyl group (C=O) and a methoxy group (OCH<sub>3</sub>). Various side chains are attached, including a propenyl chain with an aldehyde group (OHC), a dimethylallyl chain, and a dimethylallyl chain.</p>                                          | MRSA                         | 115.25 | 52 |



|     |                |                                        |                                                                                                                                                                                                                                                                                                                                                                                                                                                                                                                              |      |        |    |
|-----|----------------|----------------------------------------|------------------------------------------------------------------------------------------------------------------------------------------------------------------------------------------------------------------------------------------------------------------------------------------------------------------------------------------------------------------------------------------------------------------------------------------------------------------------------------------------------------------------------|------|--------|----|
| 195 | Moreollin acid | the fruits of <i>Garcinia hanburyi</i> | 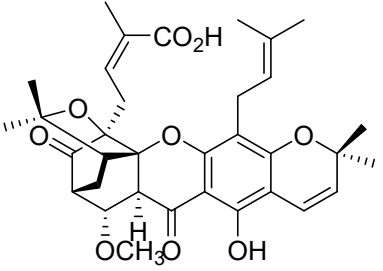 <p>The structure of Moreollin acid is a complex polycyclic molecule. It features a central benzene ring fused to a six-membered ring containing a lactone group and a methyl group. This is further fused to a five-membered ring with a methyl group and a hydroxyl group. A side chain with a methyl group and a propenoic acid moiety is attached to the central ring. Stereochemistry is indicated with wedged and dashed bonds.</p> | MRSA | 14.80  | 52 |
| 196 | Morellin       | the fruits of <i>Garcinia hanburyi</i> |  <p>The structure of Morellin is similar to Moreollin acid but lacks the propenoic acid side chain, instead having a propenal side chain. The rest of the polycyclic core, including the lactone and hydroxyl groups, remains the same. Stereochemistry is indicated with wedged and dashed bonds.</p>                                                                                                                                    | MRSA | 108.85 | 52 |
| 197 | Morellic acid  | the fruits of <i>Garcinia hanburyi</i> |  <p>The structure of Morellic acid is identical to Moreollin acid, featuring the same polycyclic core and propenoic acid side chain. Stereochemistry is indicated with wedged and dashed bonds.</p>                                                                                                                                                                                                                                      | MRSA | 14     | 52 |

|     |                   |                                               |                                                                                      |                              |     |       |
|-----|-------------------|-----------------------------------------------|--------------------------------------------------------------------------------------|------------------------------|-----|-------|
| 198 | Scortechterpene A | the fruits of <i>Garcinia scortechinii</i>    | 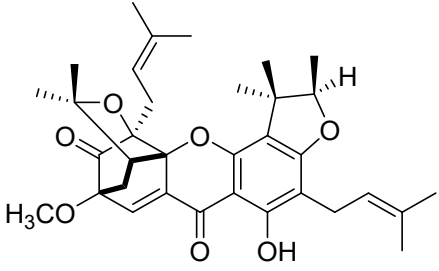  | MRSA                         | 128 | 34,35 |
| 199 | Scortechinone M   | the stem bark of <i>Garcinia scortechinii</i> |   | <i>Staphylococcus aureus</i> | 32  | 49    |
|     |                   |                                               |                                                                                      | <i>Staphylococcus aureus</i> | 32  |       |
| 200 | Scortechinone N   | the stem bark of <i>Garcinia scortechinii</i> |  | <i>Staphylococcus aureus</i> | 32  | 49    |
|     |                   |                                               |                                                                                      | <i>Staphylococcus aureus</i> | 32  |       |

|     |                     |                                            |                                                                                      |                                                                                                                                                                                                                                                   |                                                           |       |
|-----|---------------------|--------------------------------------------|--------------------------------------------------------------------------------------|---------------------------------------------------------------------------------------------------------------------------------------------------------------------------------------------------------------------------------------------------|-----------------------------------------------------------|-------|
| 201 | Scortechinone B     | the fruits of <i>Garcinia scortechinii</i> | 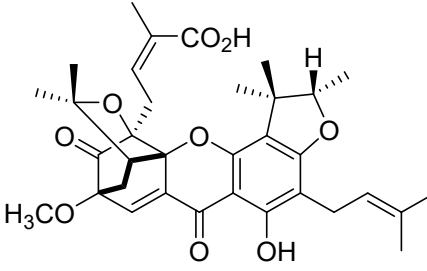  | MRSA                                                                                                                                                                                                                                              | 2                                                         | 34,35 |
| 202 | Neobractatin        | the roots of <i>Garcinia propinqua</i>     |   | <i>Bacillus cereus</i><br><i>Bacillus subtilis</i><br><i>Escherichia coli</i><br><i>Staphylococcus typhimurium</i>                                                                                                                                | 32<br>1<br>128<br>128                                     | 43    |
| 203 | Cochinchinoxanthone | the roots of <i>Cratoxylum sumatranum</i>  |  | <i>Micrococcus luteus</i><br><i>Bacillus cereus</i><br><i>Bacillus subtilis</i><br><i>Staphylococcus aureus</i><br><i>Staphylococcus epidermidis</i><br><i>Escherichia coli</i><br><i>Salmonella typhimurium</i><br><i>Pseudomonas aeruginosa</i> | >128<br>>128<br>\<br>>128<br>>128<br>>128<br>>128<br>>128 | 51    |

|              |                   |                                               |                                                                                       |                                       |      |    |
|--------------|-------------------|-----------------------------------------------|---------------------------------------------------------------------------------------|---------------------------------------|------|----|
| 204          | Scortechinone K   | the stem bark of <i>Garcinia scortechinii</i> | 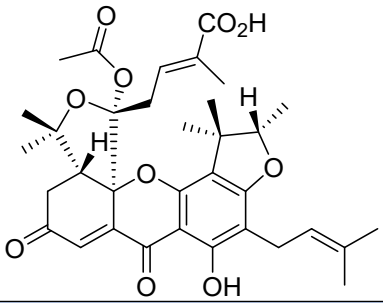   | <i>Staphylococcus aureus</i>          | 128  | 49 |
| Bi-xanthones |                   |                                               |                                                                                       |                                       |      |    |
| 205          | Secalonic acid A  |                                               |    | <i>Staphylococcus aureus</i>          | 12.5 | 70 |
|              |                   |                                               |                                                                                       | <i>Escherichia coli</i>               | 25   |    |
|              |                   |                                               |                                                                                       | <i>Sarcina ventriculi</i>             | 12.5 |    |
|              |                   |                                               |                                                                                       | <i>Pseudomonas aeruginosa</i>         | 12.5 |    |
| 206          | Secalonic acid D  |                                               |   | <i>Bacillus subtilis</i>              | 24.4 | 69 |
|              |                   |                                               |                                                                                       | <i>Escherichia coli</i>               | 24.4 |    |
|              |                   |                                               |                                                                                       | <i>Micrococcus luteus</i>             | 24.4 |    |
|              |                   |                                               |                                                                                       | <i>Pseudoalteromonas nigrifaciens</i> | 97.5 |    |
| 207          | Globulixanthone E | the root bark of <i>Symphonia globulifera</i> |  | <i>Staphylococcus aureus</i>          | 4.51 | 16 |
|              |                   |                                               |                                                                                       | <i>Bacillus subtilis</i>              | 3.12 |    |
|              |                   |                                               |                                                                                       | <i>Vibrio anguillarum</i>             | 5.56 |    |

|     |                  |                                        |                                                                                       |                                       |        |    |
|-----|------------------|----------------------------------------|---------------------------------------------------------------------------------------|---------------------------------------|--------|----|
|     |                  |                                        |                                                                                       | <i>Escherichia coli</i>               | >100   |    |
| 208 | Garmoxanthone    | the bark of <i>Garcinia mangostana</i> | 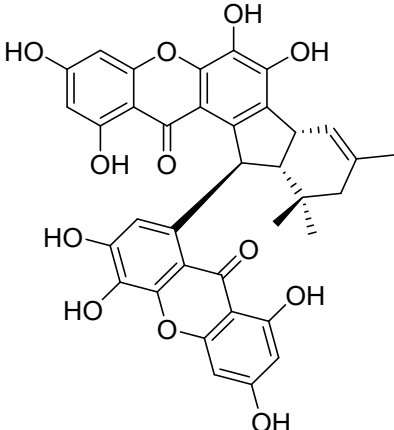   | MRSA                                  | 3.9    | 38 |
|     |                  |                                        |                                                                                       | <i>Vibrio vulnificus</i>              | 15.6   |    |
|     |                  |                                        |                                                                                       | <i>Vibrio rotiferianus</i>            | 15.6   |    |
|     |                  |                                        |                                                                                       | <i>Vibrio campbellii</i>              | 31.2   |    |
| 209 | Dicerandrol C    |                                        |   | <i>Staphylococcus aureus</i>          | 1/1.33 | 71 |
|     |                  |                                        |                                                                                       | <i>Staphylococcus saprophyticus</i>   | 2/2.66 |    |
| 210 | Secalonic acid B |                                        |  | <i>Bacillus subtilis</i>              | 24.4   | 72 |
|     |                  |                                        |                                                                                       | <i>Escherichia coli</i>               | 24.4   |    |
|     |                  |                                        |                                                                                       | <i>Micrococcus luteus</i>             | 24.4   |    |
|     |                  |                                        |                                                                                       | <i>Pseudoalteromonas nigrifaciens</i> | 97.5   |    |
|     |                  |                                        |                                                                                       |                                       |        |    |

| Other xanthone derivatives |                        |                              |                                                                                                                                                                                                                                                                                                                                                               |                                  |                                      |    |
|----------------------------|------------------------|------------------------------|---------------------------------------------------------------------------------------------------------------------------------------------------------------------------------------------------------------------------------------------------------------------------------------------------------------------------------------------------------------|----------------------------------|--------------------------------------|----|
| 211                        | Citreamicin $\delta$   | <i>Streptomyces vinaceus</i> | 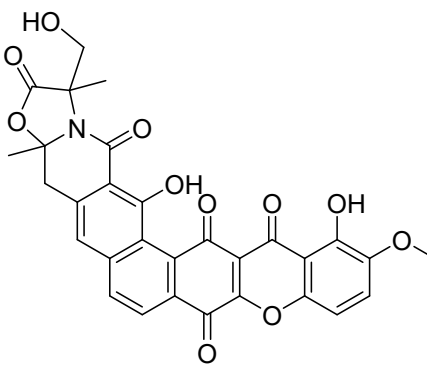 <p>The structure shows a xanthone core with a 2-hydroxyethylamino group at position 1, a methyl group at position 2, and a 2-methoxyphenyl group at position 8. The xanthone ring has carbonyl groups at positions 3 and 4, and hydroxyl groups at positions 5 and 7.</p> | <i>Staphylococcus aureus</i>     | $\leq 0.5 \setminus 1 \setminus 2$   | 24 |
|                            |                        |                              |                                                                                                                                                                                                                                                                                                                                                               | VRE                              | $\leq 0.25$                          |    |
|                            |                        |                              |                                                                                                                                                                                                                                                                                                                                                               | <i>Streptococcus pneumoniae</i>  | $\leq 0.06$                          |    |
|                            |                        |                              |                                                                                                                                                                                                                                                                                                                                                               | <i>Haemophilus influenzae</i>    | 1                                    |    |
|                            |                        |                              |                                                                                                                                                                                                                                                                                                                                                               | <i>Hemophilus parainfluenzae</i> | 1                                    |    |
|                            |                        |                              |                                                                                                                                                                                                                                                                                                                                                               | <i>Escherichia coli</i>          | $> 64$                               |    |
|                            |                        |                              |                                                                                                                                                                                                                                                                                                                                                               | <i>Klebsiella pneumoniae</i>     | $> 64$                               |    |
|                            |                        |                              |                                                                                                                                                                                                                                                                                                                                                               | <i>Moraxella catarrhalis</i>     | 4                                    |    |
|                            |                        |                              |                                                                                                                                                                                                                                                                                                                                                               | <i>Serratia marcescens</i>       | $> 64$                               |    |
|                            |                        |                              |                                                                                                                                                                                                                                                                                                                                                               | <i>Pseudomonas aeruginosa</i>    | $> 64$                               |    |
| 212                        | Citreamicin $\epsilon$ | <i>Streptomyces vinaceus</i> |  <p>The structure is similar to Citreamicin delta but with a methyl group at position 2 and a 2-hydroxyethylamino group at position 1. The xanthone ring has carbonyl groups at positions 3 and 4, and hydroxyl groups at positions 5 and 7.</p>                         | <i>Staphylococcus aureus</i>     | $0.13 \setminus 0.12 \setminus 0.25$ | 24 |
|                            |                        |                              |                                                                                                                                                                                                                                                                                                                                                               | VRE                              | 0.5                                  |    |
|                            |                        |                              |                                                                                                                                                                                                                                                                                                                                                               | <i>Streptococcus pneumoniae</i>  | $0.25 \setminus 0.12$                |    |
|                            |                        |                              |                                                                                                                                                                                                                                                                                                                                                               | <i>Haemophilus</i>               | $> 32$                               |    |

|     |               |                                            |                                                                                       |                                                                                                                                                                                                                 |                                                                    |    |
|-----|---------------|--------------------------------------------|---------------------------------------------------------------------------------------|-----------------------------------------------------------------------------------------------------------------------------------------------------------------------------------------------------------------|--------------------------------------------------------------------|----|
|     |               |                                            |                                                                                       | <i>influenzae</i><br><i>Hemophilus parainfluenzae</i><br><i>Escherichia coli</i><br><i>Klebsiella pneumoniae</i><br><i>Moraxella catarrhalis</i><br><i>Serratia marcescens</i><br><i>Pseudomonas aeruginosa</i> | <br><br>>32<br><br>>32<br><br>>32<br><br>0.5<br><br>>32<br><br>>32 |    |
| 213 | Xantholipin B | <i>Streptomyces flocculus</i> CGMCC 4.1223 | 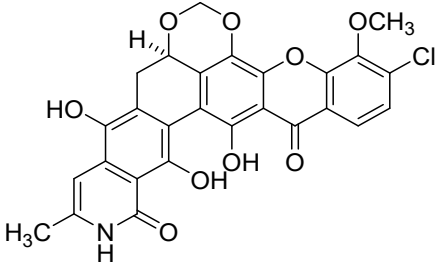   | <i>Bacillus mycoides</i><br><i>Mycobacterium smegmatis</i><br><i>Staphylococcus aureus</i><br><i>Pseudomonas aeruginosa</i><br><i>Klebsiella pneumoniae</i><br><i>Escherichia coli</i>                          | <br>0.08<br>5.0<br>0.025<br>>30<br>>30<br>>30                      | 26 |
| 214 | Xantholipin   | <i>Streptomyces flocculus</i> CGMCC 4.1223 |  | <i>Bacillus mycoides</i><br><i>Mycobacterium smegmatis</i><br><i>Staphylococcus</i>                                                                                                                             | <br>0.08<br>5.0<br>0.025                                           | 26 |

|     |                   |                                           |                                                                                       |                                  |      |    |
|-----|-------------------|-------------------------------------------|---------------------------------------------------------------------------------------|----------------------------------|------|----|
|     |                   |                                           |                                                                                       | <i>aureus</i>                    |      |    |
|     |                   |                                           |                                                                                       | <i>Pseudomonas aeruginosa</i>    | >30  |    |
|     |                   |                                           |                                                                                       | <i>Klebsiella pneumoniae</i>     | >30  |    |
|     |                   |                                           |                                                                                       | <i>Escherichia coli</i>          | >30  |    |
| 215 | Aspergixanthone G | fungus <i>Aspergillus</i> sp.             | 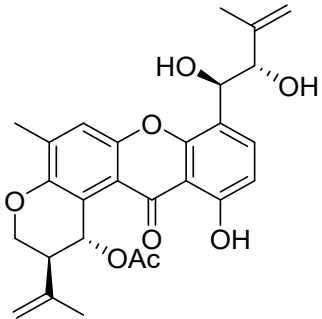   | <i>Micrococcus lysodeikticus</i> | 0.78 | 39 |
|     |                   |                                           |                                                                                       | <i>Bacillus anthracis</i>        | 12.5 |    |
|     |                   |                                           |                                                                                       | <i>Salmonella typhi</i>          | 6.13 |    |
|     |                   |                                           |                                                                                       | <i>Enterobacter aerogenes</i>    | 6.13 |    |
| 216 | Aspergixanthone H | fungus <i>Aspergillus</i> sp.             |   | <i>Micrococcus lysodeikticus</i> | 6.13 | 39 |
|     |                   |                                           |                                                                                       | <i>Bacillus anthracis</i>        | 12.5 |    |
|     |                   |                                           |                                                                                       | <i>Salmonella typhi</i>          | 6.13 |    |
|     |                   |                                           |                                                                                       | <i>Enterobacter aerogenes</i>    | 6.13 |    |
| 217 | Varixanthone      | the fungus of <i>Emericella varicolor</i> |  | <i>Escherichia coli</i>          | 12.5 | 62 |
|     |                   |                                           |                                                                                       | <i>Proteus</i> sp.               | 12.5 |    |
|     |                   |                                           |                                                                                       | <i>Bacillus subtilis</i>         | 12.5 |    |



|     |                                           |                                        |                                                                                      |                               |      |    |
|-----|-------------------------------------------|----------------------------------------|--------------------------------------------------------------------------------------|-------------------------------|------|----|
|     |                                           |                                        |                                                                                      | <i>Staphylococcus aureus</i>  | 12.5 |    |
| 218 | 14-Hydroxyltajixanthone                   | the fungus <i>Emericella</i> sp. XL029 | 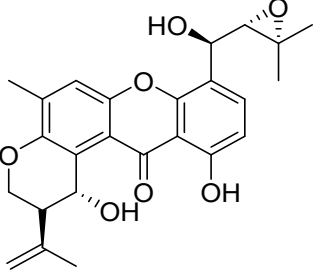  | <i>Micrococcus luteus</i>     | 25   | 62 |
|     |                                           |                                        |                                                                                      | <i>Staphylococcus aureus</i>  | 25   |    |
|     |                                           |                                        |                                                                                      | <i>Bacillus megaterium</i>    | 12.5 |    |
|     |                                           |                                        |                                                                                      | <i>Bacillus anthracis</i>     | 12.5 |    |
|     |                                           |                                        |                                                                                      | <i>Bacillus paratyphosum</i>  | 12.5 |    |
|     |                                           |                                        |                                                                                      | MRSA                          | 50   |    |
|     |                                           |                                        |                                                                                      | <i>Pseudomonas aeruginosa</i> | 50   |    |
|     |                                           |                                        |                                                                                      | <i>Bacillus cereus</i>        | 50   |    |
|     |                                           |                                        |                                                                                      | <i>Enterobacter aerogenes</i> | 25   |    |
| 220 | 14-Hydroxyl-15-chlorotajixanthone hydrate | the fungus <i>Emericella</i> sp. XL029 |  | <i>Micrococcus luteus</i>     | 25   | 62 |
|     |                                           |                                        |                                                                                      | <i>Staphylococcus aureus</i>  | 25   |    |
|     |                                           |                                        |                                                                                      | <i>Bacillus megaterium</i>    | 25   |    |
|     |                                           |                                        |                                                                                      | <i>Bacillus anthracis</i>     | 25   |    |
|     |                                           |                                        |                                                                                      | <i>Bacillus paratyphosum</i>  | 25   |    |
|     |                                           |                                        |                                                                                      | MRSA                          | >100 |    |

|     |                                  |                                        |                                                                                       |                               |      |    |
|-----|----------------------------------|----------------------------------------|---------------------------------------------------------------------------------------|-------------------------------|------|----|
|     |                                  |                                        |                                                                                       | <i>Pseudomonas aeruginosa</i> | 50   |    |
|     |                                  |                                        |                                                                                       | <i>Escherichia coli</i>       | 50   |    |
|     |                                  |                                        |                                                                                       | <i>Enterobacter aerogenes</i> | 50   |    |
| 221 | 14-Methoxytjixanthone-25-acetate | the fungus <i>Emericella</i> sp. XL029 | 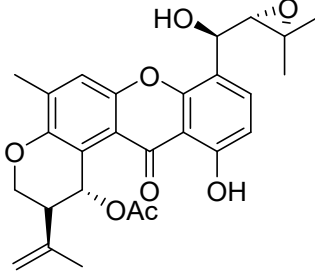   | <i>Micrococcus luteus</i>     | 25   | 62 |
|     |                                  |                                        |                                                                                       | <i>Staphylococcus aureus</i>  | 25   |    |
|     |                                  |                                        |                                                                                       | <i>Bacillus megaterium</i>    | 12.5 |    |
|     |                                  |                                        |                                                                                       | <i>Bacillus anthracis</i>     | 25   |    |
|     |                                  |                                        |                                                                                       | <i>Bacillus paratyphosum</i>  | 25   |    |
|     |                                  |                                        |                                                                                       | MRSA                          | >100 |    |
|     |                                  |                                        |                                                                                       | <i>Pseudomonas aeruginosa</i> | 50   |    |
|     |                                  |                                        |                                                                                       | <i>Escherichia coli</i>       | 50   |    |
|     |                                  |                                        |                                                                                       | <i>Enterobacter aerogenes</i> | 50   |    |
| 222 | 15-Chlorotjixanthone hydrate     | the fungus <i>Emericella</i> sp. XL029 |  | <i>Micrococcus luteus</i>     | 50   | 62 |
|     |                                  |                                        |                                                                                       | <i>Staphylococcus aureus</i>  | 25   |    |
|     |                                  |                                        |                                                                                       | <i>Bacillus megaterium</i>    | 12.5 |    |
|     |                                  |                                        |                                                                                       | <i>Bacillus anthracis</i>     | 50   |    |
|     |                                  |                                        |                                                                                       | <i>Bacillus</i>               | 25   |    |

|     |                 |                               |                                                                                                                                                                                                                                                                                                                                                                                                                                                                                                                                                                   |                                    |        |    |
|-----|-----------------|-------------------------------|-------------------------------------------------------------------------------------------------------------------------------------------------------------------------------------------------------------------------------------------------------------------------------------------------------------------------------------------------------------------------------------------------------------------------------------------------------------------------------------------------------------------------------------------------------------------|------------------------------------|--------|----|
|     |                 |                               |                                                                                                                                                                                                                                                                                                                                                                                                                                                                                                                                                                   | <i>paratyphosum</i>                |        |    |
|     |                 |                               |                                                                                                                                                                                                                                                                                                                                                                                                                                                                                                                                                                   | MRSA                               | >100   |    |
|     |                 |                               |                                                                                                                                                                                                                                                                                                                                                                                                                                                                                                                                                                   | <i>Pseudomonas aeruginosa</i>      | 50     |    |
|     |                 |                               |                                                                                                                                                                                                                                                                                                                                                                                                                                                                                                                                                                   | <i>Escherichia coli</i>            | 50     |    |
|     |                 |                               |                                                                                                                                                                                                                                                                                                                                                                                                                                                                                                                                                                   | <i>Enterobacter aerogenes</i>      | 50     |    |
| 223 | Citreamicin θ A | <i>Streptomyces caelestis</i> | 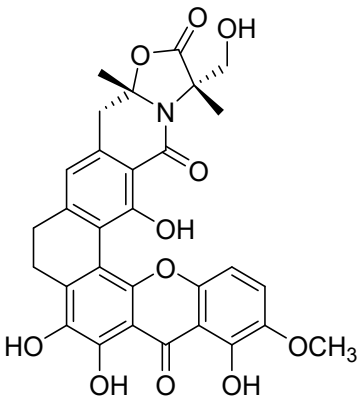 <p>The chemical structure of Citreamycin θ A features a complex polycyclic core. It includes a decalin system fused to a benzene ring, which is further fused to a pyridone ring. A methoxy group (-OCH<sub>3</sub>) is attached to the pyridone ring. A side chain containing a hydroxyl group (-OH) and a methyl group is attached to the decalin system. A lactam ring is fused to the side chain, with a hydroxyl group (-OH) and a methyl group also attached to it.</p> | <i>Staphylococcus haemolyticus</i> | 0.5    | 64 |
|     |                 |                               |                                                                                                                                                                                                                                                                                                                                                                                                                                                                                                                                                                   | <i>Staphylococcus aureus</i>       | 1\0.25 |    |
|     |                 |                               |                                                                                                                                                                                                                                                                                                                                                                                                                                                                                                                                                                   | <i>Bacillus subtilis</i>           | 0.25   |    |
| 224 | Citreamicin θ B | <i>Streptomyces caelestis</i> |  <p>The chemical structure of Citreamycin θ B is very similar to Citreamycin θ A, but with a different side chain configuration. It features the same polycyclic core (decalin, benzene, and pyridone rings) with a methoxy group (-OCH<sub>3</sub>) and a hydroxyl group (-OH) on the pyridone ring. The side chain on the decalin system is different, and the lactam ring has a different orientation of its methyl and hydroxyl groups.</p>                              | <i>Staphylococcus haemolyticus</i> | 0.5    | 64 |
|     |                 |                               |                                                                                                                                                                                                                                                                                                                                                                                                                                                                                                                                                                   | <i>Staphylococcus aureus</i>       | 1\0.25 |    |
|     |                 |                               |                                                                                                                                                                                                                                                                                                                                                                                                                                                                                                                                                                   | <i>Bacillus subtilis</i>           | 0.25   |    |

|     |                       |                               |                                                                                                                                                                                                                                                                                                                                                                                                                                                                                                                                                   |                                    |        |    |
|-----|-----------------------|-------------------------------|---------------------------------------------------------------------------------------------------------------------------------------------------------------------------------------------------------------------------------------------------------------------------------------------------------------------------------------------------------------------------------------------------------------------------------------------------------------------------------------------------------------------------------------------------|------------------------------------|--------|----|
| 225 | Citreaglycon A        | <i>Streptomyces caelestis</i> | 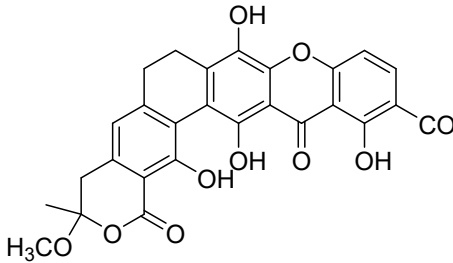 <p>The chemical structure of Citreaglycon A is a complex polycyclic molecule. It features a central benzene ring fused to a six-membered ring containing a hydroxyl group and a carbonyl group. This is further fused to a five-membered ring with a methoxy group and a carbonyl group. The structure is highly substituted with multiple hydroxyl groups and a carbonyl group.</p>                                                                          | <i>Staphylococcus haemolyticus</i> | 8.0    | 64 |
|     |                       |                               |                                                                                                                                                                                                                                                                                                                                                                                                                                                                                                                                                   | <i>Staphylococcus aureus</i>       | 16.0\8 |    |
|     |                       |                               |                                                                                                                                                                                                                                                                                                                                                                                                                                                                                                                                                   | <i>Bacillus subtilis</i>           | 8.0    |    |
| 226 | Dehydrocitreaglycon A | <i>Streptomyces caelestis</i> |  <p>The chemical structure of Dehydrocitreaglycon A is similar to Citreaglycon A, but with a different arrangement of the fused rings and substituents. It features a central benzene ring fused to a six-membered ring containing a hydroxyl group and a carbonyl group. This is further fused to a five-membered ring with a methoxy group and a carbonyl group. The structure is highly substituted with multiple hydroxyl groups and a carbonyl group.</p> | <i>Staphylococcus haemolyticus</i> | 8.0    | 64 |
|     |                       |                               |                                                                                                                                                                                                                                                                                                                                                                                                                                                                                                                                                   | <i>Staphylococcus aureus</i>       | 16.0   |    |
|     |                       |                               |                                                                                                                                                                                                                                                                                                                                                                                                                                                                                                                                                   | <i>Bacillus subtilis</i>           | 8.0    |    |

## Reference:

1. I. Siridechakorn, W. Phakhodee, T. Ritthiwigrom, T. Promgool, S. Deachathai, S. Cheenpracha, U. Prawat and S. Laphookhieo, *Fitoterapia*, 2012, **83**, 1430-1434.
2. C. Auranwiwat, K. Trisuwan, A. Saiai, S. G. Pyne and T. Ritthiwigrom, *Fitoterapia*, 2014, **98**, 179-183.
3. G. A. Mohamed, S. R. Ibrahim, M. I. Shaaban and S. A. Ross, *Fitoterapia*, 2014, **98**, 215-221.
4. A. Raksat, W. Maneerat, R. J. Andersen, S. G. Pyne and S. Laphookhieo, *Fitoterapia*, 2019, **136**.
5. E. E. Eltamany, U. R. Abdelmohsen, A. K. Ibrahim, H. A. Hassanean, U. Hentschel and S. A. Ahmed, *Bioorg Med Chem Lett*, 2014, **24**, 4939-4942.
6. M. M. Wagenaar and J. Clardy, *Journal of Natural Products*, 2001, **64**, 1006-1009.
7. T. Kodama, T. Ito, D. F. Dibwe, S. Y. Woo and H. Morita, *Bioorg Med Chem Lett*, 2017, **27**, 2397-2400.
8. N. Boonnak, S. Chantrapromma, K. Sathirakul and C. Kaewpiboon, *Bioorg Med Chem Lett*, 2020, **30**.
9. S. M. Lin, C. J. Zhu, H. X. Li, Y. Z. Chen and S. P. Liu, *Biochimica Et Biophysica Acta-Biomembranes*, 2020, **1862**.
10. J. J. Koh, H. X. Zou, D. Mukherjee, S. M. Lin, F. H. Lim, J. K. Tan, D. Z. Tan, B. L. Stocker, M. S. M. Timmer, H. M. Corkran, R. Lakshminarayanan, D. T. H. Tan, D. R. Cao, R. W. Beuerman, T. Dick and S. P. Liu, *European Journal of Medicinal Chemistry*, 2016, **123**, 684-703.
11. A. E. Nkengfack, P. Mkounga, M. Meyer, Z. T. Fomum and B. Bodo, *Phytochemistry*, 2002, **61**, 181-187.
12. A. G. Azebaze, M. Meyer, B. Bodo and A. E. Nkengfack, *Phytochemistry*, 2004, **65**, 2561-2564.
13. K. Panthong, W. Pongcharoen, S. Phongpaichit and W. C. Taylor, *Phytochemistry*, 2006, **67**, 999-1004.
14. S. Klaiklay, Y. Sukpondma, V. Rukachaisirikul and S. Phongpaichit, *Phytochemistry*, 2013, **85**, 161-166.
15. S. Mahamodo, C. Riviere, C. Neut, A. Abedini, H. Ranarivelo, N. Duhal, V. Roumy, T. Hennebelle, S. Sahpaz, A. Lemoine, D. Razafimahefa, B. Razanamahefa, F. Bailleul and B. Andriamihaja, *Phytochemistry*, 2014, **102**, 162-168.
16. H. R. W. Dharmaratne, W. M. N. M. Wijesinghe and V. Thevanasem, *Journal of Ethnopharmacology*, 1999, **66**, 339-342.
17. J. J. Omolo, M. M. Johnson, S. F. van Vuuren and C. B. de Koning, *Bioorg Med Chem Lett*, 2011, **21**, 7085-7088.
18. S. Deachathai, S. Phongpaichit and W. Mahabusarakam, *Nat Prod Res*, 2008, **22**, 1327-1332.
19. J. Ngoupayo, T. K. Tabopda and M. S. Ali, *Bioorg Med Chem*, 2009, **17**, 5688-5695.
20. V. Rukachaisirikul, K. Tadpetch, A. Watthanaphanit, N. Saengsanee and S. Phongpaichit, *J Nat Prod*, 2005, **68**, 1218-1221.
21. H. Fouotsa, A. T. Mbaveng, C. D. Mbazona, A. E. Nkengfack, S. Farzana, C. M. Iqbal, J. J. Meyer, N. Lall and V. Kuete, *BMC Complement Altern Med*, 2013, **13**, 81.
22. G. A. Mohamed, S. R. M. Ibrahim, N. A. Alhakamy and O. S. Aljohani, *Nat Prod Res*, 2020, DOI: 10.1080/14786419.2020.1855165, 1-9.
23. F. Song, B. Ren, C. Chen, K. Yu, X. Liu, Y. Zhang, N. Yang, H. He, X. Liu, H. Dai and L. Zhang, *Appl Microbiol Biotechnol*, 2014, **98**, 3753-3758.
24. D. C. Hopp, D. J. Milanowski, J. Rhea, D. Jacobsen, J. Rabenstein, C. Smith, K. Romari, M. Clarke, L. Francis, M. Irigoyen, M. Luche, G. J. Carr and U. Mocek, *J Nat Prod*, 2008, **71**, 2032-2035.
25. S. Ngouela, B. L. Ndjakou, D. N. Tchamo, F. Zelefack, E. Tsamo and J. D. Connolly, *Nat Prod Res*, 2005, **19**, 23-27.
26. S. F. Wu, T. T. Huang, D. Xie, J. Wo, X. Z. Wang, Z. X. Deng and S. J. Lin, *J Antibiot*, 2017, **70**, 90-95.
27. K. Trisuwan and T. Ritthiwigrom, *Arch Pharm Res*, 2012, **35**, 1733-1738.
28. Y. Sakagami, K. Kajimura, W. M. N. M. Wijesinghe and H. R. W. Dharmaratne, *Planta Medica*, 2002, **68**, 541-543.
29. N. Boonnak, C. Karalai, S. Chantrapromma, C. Ponglimanont, A. Kanjana-Opas, K. Chantrapromma and S. Kato, *Chem Pharm Bull*, 2010, **58**, 386-389.
30. S. Limsuwan, E. N. Trip, T. R. Kouwen, S. Piersma, A. Hiranrat, W. Mahabusarakam, S. P. Voravuthikunchai, J. M. van Dijk and O. Kayser, *Phytomedicine*, 2009, **16**, 645-651.
31. T. Kaneshima, T. Myoda, K. Toeda, T. Fujimori and M. Nishizawa, *Biosci Biotechnol Biochem*, 2017, **81**, 1461-1465.

32. S. Boonsri, C. Karalai, C. Ponglimanont, A. Kanjana-opas and K. Chantrapromma, *Phytochemistry*, 2006, **67**, 723-727.
33. W. Y. Wang, M. L. Gao, Z. H. Luo, Y. Y. Liao, B. B. Zhang, W. Q. Ke, Z. Z. Shao, F. Li and J. M. Chen, *Natural Product Research*, 2019, **33**, 3077-3082.
34. Y. Sukpondma, V. Rukachaisirikul and S. Phongpaichit, *J Nat Prod*, 2005, **68**, 1010-1017.
35. N. Anantachoke, P. Tuchinda, C. Kuhakarn, M. Pohmakotr and V. Reutrakul, *Pharm Biol*, 2012, **50**, 78-91.
36. S. Q. Yang, X. M. Li, G. M. Xu, X. Li, C. Y. An and B. G. Wang, *J Antibiot (Tokyo)*, 2018, **71**, 778-784.
37. S. Sanpa, M. Popova, V. Bankova, T. Tunkasiri, S. Eitssayeam and P. Chantawannakul, *PLoS One*, 2015, **10**, e0126886.
38. W. Wang, Y. Liao, X. Huang, C. Tang and P. Cai, *Nat Prod Res*, 2018, **32**, 1769-1774.
39. A. Zhu, M. Y. Yang, Y. H. Zhang, C. L. Shao, C. Y. Wang, L. D. Hu, F. Cao and H. J. Zhu, *Sci Rep*, 2018, **8**, 10621.
40. A. Coqueiro, Y. H. Choi, R. Verpoorte, K. B. Gupta, M. De Mieri, M. Hamburger, M. C. Young, P. Stapleton, S. Gibbons and S. Bolzani Vda, *J Nat Prod*, 2016, **79**, 470-476.
41. K. Y. He, C. Zhang, Y. R. Duan, G. L. Huang, C. Y. Yang, X. R. Lu, C. J. Zheng and G. Y. Chen, *J Antibiot*, 2017, **70**, 823-827.
42. C. Tantapakul, W. Phakhodee, T. Ritthiwigrom, S. Cheenpracha, U. Prawat, S. Deachathai and S. Laphookhieo, *J Nat Prod*, 2012, **75**, 1660-1664.
43. P. Meesakul, A. Pansanit, W. Maneerat, T. Sripisut, T. Ritthiwigrom, T. Machan, S. Cheenpracha and S. Laphookhieo, *Nat Prod Commun*, 2016, **11**, 87-90.
44. T. Fukai, Y. Oku, A. J. Hou, M. Yonekawa and S. Terada, *Phytomedicine*, 2005, **12**, 510-513.
45. L. J. Bessa, A. Palmeira, A. S. Gomes, V. Vasconcelos, E. Sousa, M. Pinto and P. Martins da Costa, *Microb Drug Resist*, 2015, **21**, 404-415.
46. J. Nontakham, N. Charoenram, W. Upamai, M. Taweechotipatr and S. Suksamrarn, *Arch Pharm Res*, 2014, **37**, 972-977.
47. T. Sriyatep, I. Siridechakorn, W. Maneerat, A. Pansanit, T. Ritthiwigrom, R. J. Andersen and S. Laphookhieo, *J Nat Prod*, 2015, **78**, 265-271.
48. V. Rukachaisirikul, M. Kamkaew, D. Sukavisit, S. Phongpaichit, P. Sawangchote and W. C. Taylor, *J Nat Prod*, 2003, **66**, 1531-1535.
49. V. Rukachaisirikul, P. Phainuphong, Y. Sukpondma, S. Phongpaichit and W. C. Taylor, *Planta Med*, 2005, **71**, 165-170.
50. X. Hu, X. Hu, X. Hu, S. Li, L. Li, L. Yu, H. Liu, X. You, Z. Wang, L. Li, B. Yang, B. Jiang and L. Wu, *J Nat Prod*, 2019, **82**, 2337-2342.
51. C. Tantapakul, W. Maneerat, T. Sripisut, T. Ritthiwigrom, R. J. Andersen, P. Cheng, S. Cheenpracha, A. Raksat and S. Laphookhieo, *J Agric Food Chem*, 2016, **64**, 8755-8762.
52. Y. Sukpondma, V. Rukachaisirikul and S. Phongpaichit, *Chem Pharm Bull*, 2005, **53**, 850-852.
53. H. Fouotsa, A. M. Lannang, J. P. Dzoyem, S. J. N. Tatsimo, B. Neumann, C. D. Mbazona, A. A. Razakarivony, A. E. Nkengfack, J. N. Eloff and N. Sewald, *Planta Medica*, 2015, **81**, 594-599.
54. M. Iinuma, H. Tosa, T. Tanaka, F. Asai, Y. Kobayashi, R. Shimano and K. Miyauchi, *J Pharm Pharmacol*, 1996, **48**, 861-865.
55. H. R. Dharmaratne, Y. Sakagami, K. G. Piyasena and V. Thevanesam, *Nat Prod Res*, 2013, **27**, 938-941.
56. H. L. Li, X. M. Li, H. Liu, L. H. Meng and B. G. Wang, *Mar Drugs*, 2016, **14**.
57. A. Zhu, X. W. Zhang, M. Zhang, W. Li, Z. Y. Ma, H. J. Zhu and F. Cao, *Mar Drugs*, 2018, **16**.
58. X. Zhen, T. Gong, Y. H. Wen, D. J. Yan, J. J. Chen and P. Zhu, *Mar Drugs*, 2018, **16**.
59. L. Shao, Y. Marin-Felix, F. Surup, A. M. Stchigel and M. Stadler, *J Fungi (Basel)*, 2020, **6**.
60. T. Fukai, Y. Oku, A. J. Hou, M. Yonekawa and S. Terada, *Chem Biodivers*, 2004, **1**, 1385-1390.
61. J. Malmstrom, C. Christophersen, A. F. Barrero, J. E. Oltra, J. Justicia and A. Rosales, *J Nat Prod*, 2002, **65**, 364-367.
62. X. Wu, L. Z. Fang, F. L. Liu, X. J. Pang, H. L. Qin, T. Zhao, L. L. Xu, D. F. Yang and X. L. Yang, *Rsc Advances*, 2017, **7**, 31115-31122.
63. W. B. Xin, Z. J. Mao, G. L. Jin and L. P. Qin, *Phytother Res*, 2011, **25**, 536-539.
64. L. L. Liu, Y. Xu, Z. Han, Y. X. Li, L. Lu, P. Y. Lai, J. L. Zhong, X. R. Guo, X. X. Zhang and P. Y. Qian, *Mar Drugs*, 2012, **10**, 2571-2583.
65. Y. B. Ji, W. J. Chen, T. Z. Shan, B. Y. Sun, P. C. Yan and W. Jiang, *Chem Biodivers*, 2020, **17**, e1900640.

66. S. Duangsrirai, K. Choowongkomon, L. J. Bessa, P. M. Costa, N. Amat and A. Kijjoa, *Molecules*, 2014, **19**, 19923-19934.
67. A. Abdel-Lateff, C. Klemke, G. M. Konig and A. D. Wright, *J Nat Prod*, 2003, **66**, 706-708.
68. Q. Yao, J. Wang, X. Zhang, X. Nong, X. Xu and S. Qi, *Mar Drugs*, 2014, **12**, 5902-5915.
69. J. Bao, Y. L. Sun, X. Y. Zhang, Z. Han, H. C. Gao, F. He, P. Y. Qian and S. H. Qi, *J Antibiot*, 2013, **66**, 219-223.
70. F. Liu, X. L. Cai, H. Yang, X. K. Xia, Z. Y. Guo, J. Yuan, M. F. Li, Z. G. She and Y. C. Lin, *Planta Med*, 2010, **76**, 185-189.
71. C. Erbert, A. A. Lopes, N. S. Yokoya, N. A. J. C. Furtado, R. Conti, M. T. Pupo, J. L. C. Lopes and H. M. Deboni, *Bot Mar*, 2012, **55**, 435-440.
72. W. Zhang, K. Krohn, U. Zia, U. Florke, G. Pescitelli, L. Di Bari, S. Antus, T. Kurtan, J. Rheinheimer, S. Draeger and B. Schulz, *Chemistry*, 2008, **14**, 4913-4923.

## 2. The correlation between log P and MIC values of simple xanthenes.

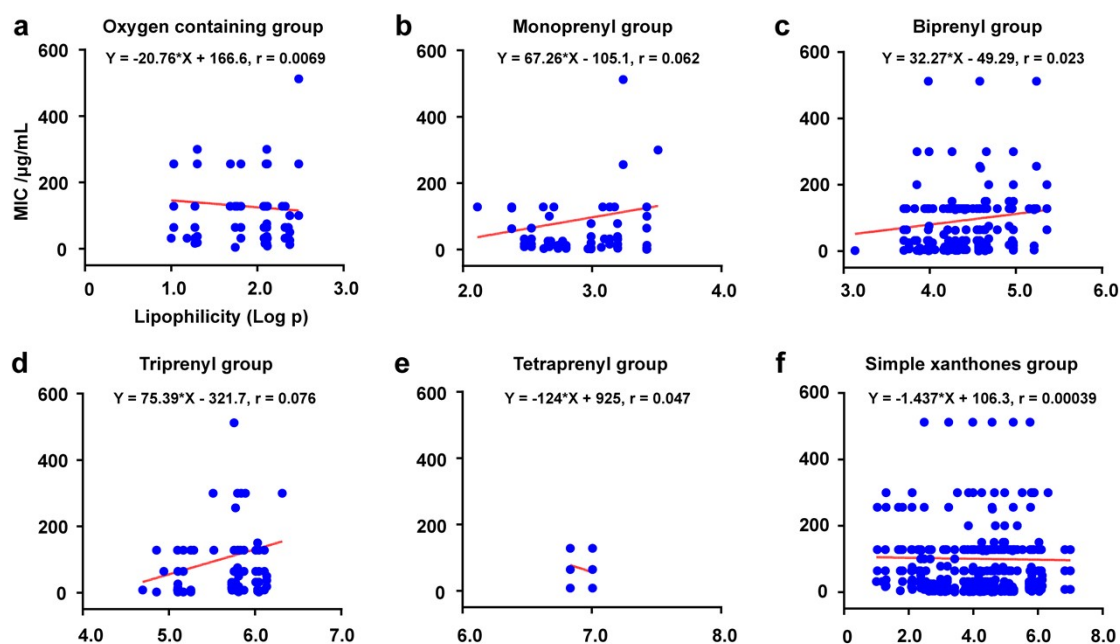

**Fig. S1** The correlation between log P and MIC values of simple xanthenes.
